1 **Rab7/Retromer-based endolysosomal trafficking facilitates effector**  
2 **secretion and host invasion in rice blast**

3

4 Xin Chen<sup>1,2#</sup>, Poonguzhali Selvaraj<sup>3#</sup>, Lili Lin<sup>1,4#</sup>, Wenqin Fang<sup>1,2</sup>, Congxian Wu<sup>1,2</sup>,  
5 Piao Yang<sup>1,2</sup>, Jing Zhang<sup>1,2</sup>, Yakubu Saddeeq Abubakar<sup>1,2</sup>, Fan Yang<sup>3</sup>, Guodong  
6 Lu<sup>1,2</sup>, Wende Liu<sup>4</sup>, Zonghua Wang<sup>1,5</sup>, Naweed I. Naqvi<sup>3\*</sup>, Wenhui Zheng<sup>1,2\*</sup>

7

8 <sup>1</sup> State Key Laboratory for Ecological Pest Control of Fujian and Taiwan Crops,  
9 College of Plant Protection, Fujian Agriculture and Forestry University, Fuzhou,  
10 China.

11 <sup>2</sup> Key Laboratory of Bio-pesticide and Chemistry Biology, Ministry of Education,  
12 College of Plant Protection, Fujian Agriculture and Forestry University, Fuzhou,  
13 Fujian, China

14 <sup>3</sup> Temasek Life Sciences Laboratory, and the Department of Biological Sciences,  
15 National University of Singapore, Singapore, Singapore

16 <sup>4</sup> State Key Laboratory for Biology of Plant Diseases and Insect Pests, Institute of  
17 Plant Protection, Chinese Academy of Agricultural Sciences, Beijing, China.

18 <sup>5</sup> Institute of Oceanography, Minjiang University, Fuzhou, China

19

20 # These authors contributed equally to this work

21 \* Authors for correspondence: Wenhui Zheng (wenhuiz@fafu.edu.cn), or Naweed  
22 I. Naqvi (naweed@tll.org.sg)

23

24

25

26

27

28 **Abstract**

29 Secretion is a fundamental process in all living organisms. Using conventional  
30 secretion pathways, many plant pathogens release effectors into the host plants  
31 to downregulate immunity and promote infection. However, this does not always  
32 constitute the only way that effectors are sorted and tracked to their final  
33 destination such as the biotrophic interfacial complex-associated effectors  
34 produced by the blast fungus *Magnaporthe oryzae*. Here, we uncover a novel  
35 unconventional route originating from fungal vacuolar membrane to the host  
36 interface and plasma membrane. We found that a GFP-MoRab7 labeled vacuole  
37 is closely associated with the interface structure throughout *M. oryzae* invasive  
38 growth. Conditional inactivation of MoRab7 impaired the establishment of the  
39 biotrophy interface and secretion of Pwl2 effector. To perform the vacuolar  
40 trafficking pathway, MoRab7 first recruits the retromer complex to the vacuole  
41 membrane, enabling it recognizes a batch of SNARE proteins, including the  
42 v-SNARE MoSnc1. Live-cell imaging supports both retromer complex component  
43 and MoSnc1 protein labeled vesicles showing the trafficking dynamics toward the  
44 interface or plasma membrane, and then fusion with target membranes. Lastly,  
45 disruption of the MoRab7/Retromer/MoSnc1-based endolysosomal cascade  
46 affects effector secretion and fungal pathogenicity. Taken together, we discovered  
47 an unconventional protein and membrane trafficking route starting from the fungal  
48 endolysosomes to the *M. oryzae*-rice interaction interface, and dissect the role of  
49 MoRab7/Retromer/MoSnc1 constituent sorting machinery in effector secretion  
50 during invasive growth in *M. oryzae*.

51

52

53

54

## 55 **Introduction**

56 Each year, crop diseases caused by phytopathogenic fungi lead to extensive yield  
57 loss and seriously threaten global food security [1, 2]. Despite the differences in  
58 lifestyles, a majority of these phytopathogens use a common strategy i.e.  
59 secretion of fungal effectors into the host to facilitate colonization [2, 3]. *M. oryzae*,  
60 the causal agent of the rice blast disease, seriously threatens rice production  
61 worldwide and has emerged as a top model to study host-fungus interaction [1, 4].  
62 During host interaction, *M. oryzae* deploys various of effectors inside the rice to  
63 subvert host immunity response and facilitate host colonization [2]. Earlier studies  
64 have revealed two distinct effector secretion systems in *M. oryzae* [2, 5]. Effectors,  
65 such as LysM protein 1 and Bas4, are delivered into the apoplastic compartment  
66 where enclosed by extensions of the plant plasma membrane termed the  
67 extra-invasive hyphal membrane (EIHM), outlining the entire IH uniformly via the  
68 conventional secretion pathway [6, 7]. The conventional secretion starts at the  
69 endoplasmic reticulum (ER) and routes proteins to the Golgi apparatus via  
70 COPII-coated vesicles, and then proteins destined for the cell surface can be  
71 sorted into transport vesicles for delivery to the plasma membrane [8]. In *M.*  
72 *oryzae*, a novel COPII uncoating factor MoSwa2, interacts with MoSec24-2 and  
73 coordinates secretion of apoplastic effectors [9]. Additionally, the COPII cargo  
74 receptor MoErv29 plays important roles in mediating extracellular laccases and  
75 apoplastic effector secretion [10], indicating the importance of the conventional  
76 secretion pathway in secretion of apoplastic effectors.

77

78 In contrast to the conventional secretion pathway, leaderless cytoplasmic proteins  
79 can be translocated across the plasma membrane through the unconventional  
80 protein secretion (UPS) pathway [11]. To date, four distinct UPS secretion  
81 mechanisms have been identified [12, 13]. In Type I and Type II secretions, cargo

82 proteins are translocated across the plasma membrane through pore formation or  
83 translocated through ABC transporters [11, 14, 15]. In Type III secretion, the  
84 related cargoes are sorted into autophagosomal or endosomal vesicles, which in  
85 turn fuse with the endocytic recycling compartment to empty their contents into  
86 the extracellular space in an Sso1-dependent manner [13, 16, 17]. In Type IV  
87 secretion, signal peptide-containing proteins or specific transmembrane proteins  
88 bypass the Golgi via GRASP- or HSP70-mediated transport [13, 18]. In *M. oryzae*,  
89 the cytoplasmic effectors, such as Avr-Pita, Avr-Pizt, Pwl1 and Pwl2, first  
90 accumulate in a novel membrane structure called the biotrophic interfacial  
91 complex (BIC), and are then delivered into the host cells via the exocyst complex,  
92 and MoSso1-mediated secretion [5]. Since Brefeldin A (BFA, that inhibits  
93 conventional ER to Golgi secretion) treatment had no effect on the secretion of  
94 cytoplasmic effectors into the BIC, implying that BIC-associated cells principally  
95 secrete effectors using the UPS pathway. Although the BIC has emerged as  
96 delivery site of *M. oryzae*-deployed virulence factors, how these effectors are  
97 transported to the BIC structure remains largely unclear. Thus, understanding the  
98 unconventional trafficking pathway, especially as a point for effector transport into  
99 the BIC will be essential to fully interpret the function of such intracellular  
100 processes.

101

102 Retromer, an ancient and highly conserved multimeric protein complex, is vital for  
103 regulating the retrieval and recycling of numerous cargoes away from the  
104 degradative pathway for delivery to the trans-Golgi network (TGN). In addition to  
105 its role in retrograde trafficking, an increasing body of evidence indicates that  
106 retromer is also required for endosome to cell surface recycling [19, 20].  
107 Reflecting its central importance, retromer is essential for development and its  
108 dysfunction is linked to a number of ailments, including Alzheimer's, and



109 Parkinson's disease [21, 22]. In spite of the accumulating evidence showing the  
110 importance of retromer complex in endosome–plasma membrane protein  
111 trafficking, the actual demonstration of the presence of free retromer vesicles as a  
112 transport vector at the endosome–plasma membrane interface is still elusive,  
113 especially during pathogen-host interaction.

114

115 Our previous studies in *M. oryzae* demonstrated that the retromer complex plays  
116 vital roles in retrograde trafficking, fungal development and plant infection [23, 24].  
117 Consistent with studies in yeast, *Fusarium graminearum* and mammals,  
118 recruitment of retromer to endosomal membrane requires the Rab GTPase  
119 MoRab7 in *M. oryzae* [25-27]. Rab7 is a highly conserved protein that belongs to  
120 the Ras superfamily of small GTPase, which plays important roles in the  
121 endolysosomal system [28, 29]. The dynamic between the active GTP-bound  
122 state and inactive GDP-bound form is required for proper functioning of Rab7 [29].  
123 Similar to retromer mutants, loss of MoRab7 impairs the vacuole fusion,  
124 autophagy and pathogenicity in *M. oryzae* [25, 30]. Since the UPS pathway is  
125 important for cargo secretion, and expanding studies have unveiled the roles of  
126 endolysosomal system in UPS pathway, we therefor hypothesize that Rab7 and  
127 retromer can function together in the UPS pathway to coordinate effector  
128 secretions in *M. oryzae*.

129

130 In this study, we focused on dissecting the role of MoRab7-retromer in effector  
131 secretion and virulence in *M. oryzae*. We showed that GFP-MoRab7 labeled  
132 vacuole closely associates with the BIC structure during plant infection. MoRab7  
133 GTPase activity dysfunction impairs the BIC structure development and PwI2  
134 secretion. In addition, MoVps35 physically interacts with MoRab7 coordinate  
135 active trafficking and fusion of cargoes with the biotrophy interface. Using a

136 chemical genetic inactivation approach (tet-off system), we were able to regulate  
137 MoVps35 activity and monitor its dynamic in effector secretion. We present  
138 evidence that the retromer complex plays important role in the secretion of  
139 apoplasmic- and cytoplasmic-effectors. Furthermore, the retromer-regulated  
140 v-SNARE MoSnc1 was identified through MoVps35-GFP pull-down assays. The  
141 physical interaction with Vps35 ensures proper localization and distribution of the  
142 MoSnc1. Additionally, MoSnc1 interacts and associates with the biotrophy  
143 interface and the EIHM, and is required for proper secretion of effectors and for  
144 pathogenicity in the blast fungus. Collectively, in this study we dissect the  
145 functional role of MoRab7/Retromer/MoSnc1 cascade in effector secretion during  
146 *in planta* invasive growth of *M. oryzae*.

147

## 148 **Results**

### 149 **MoRab7 is in close proximity with and adjacent to the BIC**

150 In *M. oryzae*-invaded rice cells, the pathogen secretes cytoplasmic effector  
151 proteins such as Pwl2, into a specialized biotrophic interfacial complex (BIC).  
152 Interestingly, we found that a relatively prominent vacuole always flanks the BIC in  
153 the bulbous invasive hyphae (Fig. 1A, Video S1). To analyze/understand whether  
154 an unconventional secretion system is associated with such BIC-associated  
155 vacuoles during *M. oryzae*-rice interaction, we first generated an *M. oryzae* strain  
156 expressing Pwl2-mCherry (marker for BIC), together with GFP-MoRab7 (a  
157 generally acknowledged endosomal/vacuolar marker that mediates vesicular  
158 trafficking at the late endosomes) [25, 30]. During the growth of this dual-tagged  
159 strain inside rice cells, GFP-MoRab7 initially localized to distinct  
160 vesicular/punctate structures in the filamentous primary invasive hyphae (IH),  
161 while Pwl2-mCherry preferentially accumulated within the BIC at the hyphal tip  
162 (Fig. 1B and Fig. S1A). When the primary hyphae differentiated into bulbous IH,

163 GFP-MoRab7 epifluorescence was evident in vacuolar membrane while  
164 Pwl2-mCherry showed persistent accumulation in the mature BIC (Fig. 1C and  
165 Fig. S1B-C). Strikingly, GFP-MoRab7 positive structures (vesicular or vacuolar  
166 membrane) were often adjacent to the BIC throughout the fungal colonization  
167 process, including the initial penetration stage, IH extension, and the cell-to-cell  
168 spread (Fig. 1 and Fig. S1). Additionally, three-dimensional (3D) rendered  
169 time-lapse imaging further confirmed the close proximity of GFP-MoRab7 and the  
170 BIC (Fig. 1 and Video S2-S3), thus implying a potential functional connection  
171 between MoRab7-derived membrane trafficking and fungus-host interface.

172

### 173 **MoRab7 is essential for proper BIC development but not for maintaining the** 174 **apoplastic interface**

175 Rab GTPases function as molecular switches that cycle between active  
176 (GTP-bound) and inactive (GDP-bound) states, and this cycle is linked to their  
177 membrane and cytoplasmic localization profiles [29]. In *M. oryzae*, MoRab7 null or  
178 dominant-negative (DN, a form of GDP-bound state) mutants fail to infect rice  
179 plants even when inoculated onto wounded leaves [25, 30]. To understand the  
180 role (if any) of MoRab7 in secretion of cytoplasmic effectors via BIC, we decided  
181 to conditionally inactivate MoRab7 specifically during host penetration stages of  
182 blast infection. The *PWL2* gene is specifically and strongly expressed during  
183 invasion but remains suppressed *in vitro* and during other developmental stages  
184 including vegetative growth, conidiogenesis and appressorium formation [31].  
185 Therefore, we hypothesized that expression of an ectopic GFP-MoRab7DN  
186 construct (a form of inactive GDP-bound state) under control of the *PWL2*  
187 promoter will not only ensure inherent Rab7 maintaining a normal activity before  
188 fungal penetration but also can inactivate MoRab7 due to excessive accumulation  
189 of inactive GFP-MoRab7DN within the invaded rice cells. Two independent

190 dominant-negative alleles of Rab7 (T22N and N125I) were generated based on  
191 previous studies in yeast and mammals [25]. As expected, compared to the  
192 expression of wild-type GFP-MoRab7, the expression of GFP-MoRab7DN (T22N)  
193 or GFP-MoRab7DN (N125I) changed the localization of MoRab7 proteins to the  
194 cytoplasm in the IH (Fig. 2A-C, Fig. S2), indicating a successful inactivation of  
195 MoRab7. Under such MoRab7DN condition, Pwl2-mCherry appeared as multiple  
196 and discrete fluorescent foci in the invaded rice cells, instead of highly  
197 concentrated and specialized BIC region observed in the WT control (Fig. 2A-C,  
198 Fig. S2, video S5-S6), indicating that such developmental stage-specific inhibition  
199 of MoRab7 activity affects BIC integrity/establishment and the focal secretion of  
200 Pwl2-mCherry, leading to the production of split or distorted BICs in the  
201 MoRab7DN strains of *M. oryzae*. Next, we tested the role of a constitutively active  
202 (CA) form of MoRab7 in Pwl2 effector secretion. Our results showed that  
203 overexpression of the constitutively active GFP-MoRab7<sup>Q67L</sup> variant (GTP-bound  
204 state) using PWL2 promoter does not show any defects in the vacuolar  
205 membrane localization of GFP-MoRab7 and/or the focal secretion of Pwl2 (Fig.  
206 2D, video S7).

207

208 To understand whether the MoRab7 GTPase activity is also required for  
209 maintenance of the apoplastic interface, we used the same strategy to  
210 conditionally inactivate MoRab7 during host invasion by *M. oryzae*. The results  
211 showed that inhibition of MoRab7 GTPase activity does not affect the localization  
212 of Bas4, an apoplastic effector, during invasive growth in the rice sheath (Fig. S3).  
213 Since efficient secretion of effectors has a role in the development of rice blast  
214 disease, we next investigated the pathogenicity of GFP-MoRab7<sup>WT</sup>,  
215 GFP-MoRab7<sup>DN</sup>(T22N), GFP-MoRab7<sup>DN</sup>(N125I) and GFP-MoRab7<sup>CA</sup>(Q67L)  
216 strains on rice. Consistently, we observed that the inhibition of MoRab7 GTPase

217 activity in invasive hyphae significantly reduced *Magnaporthe* pathogenicity on  
218 rice leaves (Fig. 2F). Taken together, these results led us to conclude that the  
219 MoRab7 GTPase activity is important for establishment and development of  
220 normal BIC during plant infection by the rice blast fungus.

221

### 222 **MoRab7 interacts with MoVps35 and both proteins are associate with the** 223 **BIC during host invasion**

224 Although GFP-MoRab7 positive structures are often adjacent to the BIC, and  
225 MoRab7 GTPase function is necessary for BIC development, we failed to observe  
226 a direct transportation of GFP-MoRab7 from endosomes or vacuoles to the BIC  
227 (Fig. 1, video S1 and S2). One possible explanation for this is that MoRab7 may  
228 mediate other vesicular membrane trafficking event(s) to facilitate effector  
229 secretion. Recently, we identified that the retromer CSC subcomplex is recruited  
230 by MoRab7 and is sequentially sorted by MoVps17 for effective conidiation and  
231 pathogenicity in the blast fungus. Retromer is a multi-subunit protein complex that  
232 mediates the transportation of various transmembrane proteins/receptors from  
233 endosomes to the trans-Golgi network (TGN) or plasma membrane [20]. Based  
234 on these clues, we reasoned that MoRab7 may recruit the retromer CSC to  
235 facilitate effector secretion across the BIC interface in invaded plant cells. To test  
236 this hypothesis, we first investigated the relationship between MoRab7 and the  
237 core retromer subunit MoVps35 during invasion of rice cells by *M. oryzae*. Using  
238 co-localization and Co-IP assays, we found that MoRab7 interacts physically with  
239 MoVps35 and both are positioned next to the BIC during invasive growth (Fig.  
240 3A-B). Interestingly, live-cell imaging of BIC-associated IH dynamics clearly  
241 showed that MoVps35-GFP labeled vesicles detach from  
242 mCherry-MoRab7-labeled vacuolar membrane, and subsequently move  
243 towards/into the BIC interface over time (Fig. 3C Video S8), thus supporting the

244 idea that the retromer CSC subcomplex is recruited by MoRab7 and sequentially  
245 sorted to the BIC-associated zone in *M. oryzae*.

246

247 **Retromer complex mediates membrane trafficking to the BIC and the EIHM**  
248 **during host invasion**

249 To analyze the details of retromer-mediated trafficking across the fungus-plant  
250 interface, we co-expressed MoVps35-GFP (the core subunit of the retromer) and  
251 MoVps17-GFP (the key sorting nexin of the retromer), together with  
252 Pwl2-mCherry, respectively. In the resulting transformants, both MoVps35-GFP  
253 and MoVps17-GFP localized to distinct punctae, some of which were clearly  
254 adjacent to the Pwl2-mCherry-decorated BIC during invasive growth of *M. oryzae*  
255 (Fig. 4A-E, Fig. S4A). Using surface rendering, we reconstructed the  
256 epifluorescent interface between Pwl2-mCherry and MoVps35-GFP or  
257 MoVps17-GFP (Fig. 4A, 4B, 4D). This analysis clearly showed the intimate  
258 positioning of the retromer vesicular sorting machinery (MoVps35-GFP or  
259 MoVps17-GFP) and the BIC (Pwl2-mCherry) at the interactive interfaces (Fig. 4A,  
260 4B, 4D, Video S9 and S10). In addition, time-lapse imaging showed that  
261 MoVps35-GFP- and MoVps17-GFP-labelled vesicles move to the BIC-associated  
262 zone and later fade away (Fig. 4C and 4E, video S11 and S12), implying a likely  
263 fusion with the target membrane. We also analyzed the dynamics between  
264 MoVps35-GFP and Pwl2-mCherry in invasive hyphae in plasmolyzed rice cells,  
265 since sucrose-induced plasmolysis concentrates BIC-associated membranes [32].  
266 The results showed that MoVps35-GFP-labeled vesicles were still localized to the  
267 IH region adjacent to the BIC, thus displaying a sorting and fusion nature with the  
268 target membrane underneath the BIC (Fig. S5, video S13). However, we could not  
269 detect any direct interaction between MoVps35 and Pwl2 by bimolecular  
270 fluorescence complementation (BiFC) assay (Fig. S7). Next, we investigated the

271 spatiotemporal dynamics of MoVps35-GFP with the apoplastic effector  
272 Bas4-mCherry which accumulates in the EIHM outlining the invasive hyphae  
273 during *M. oryzae* infection. We observed that several MoVps35-GFP punctae  
274 adjacent to the EIHM throughout the fungal colonization process (Fig. 4F, Fig. S7  
275 and video S14). Consistently, time-lapse imaging further confirmed that  
276 MoVps35-GFP displays a dynamic fusion process on the plasma membrane of  
277 the invasive hyphae (Fig. 4G, video S15). We infer that the retromer complex is  
278 involved in vesicular trafficking from endosomes to the plasma membrane, and  
279 the BIC-specific membrane during *M. oryzae* pathogenesis.

280

### 281 **The retromer complex is essential for the secretion of apoplastic and** 282 **cytoplasmic effectors in *M. oryzae***

283  $\Delta Movps35$  mutant does not penetrate the rice cuticle efficiently because of the  
284 lack of retromer function during autophagy-dependent plant infection [23].  
285 However, few penetration events by the  $\Delta Movps29$  mutant were evident despite a  
286 delay and reduction in the ability of the mutant to spread between rice cells (Fig.  
287 5A). We therefore co-expressed Bas4-GFP and Pwl2-mCherry in the  $\Delta Movps29$   
288 mutant, together with the wild type, and investigated their secretion during *M.*  
289 *oryzae*-rice interaction. We found that Bas4-GFP mostly accumulated inside the  
290 vacuoles and Pwl2-mCherry appeared as multiple and discrete epifluorescent foci  
291 in the  $\Delta Movps29$  mutant invasive hyphae (Fig. 5), suggesting that the disruption  
292 of the retromer complex impairs the secretion of both the apoplastic and the  
293 cytoplasmic effectors in the blast fungus.

294

### 295 **Inactivation of MoVps35 impairs effector secretion in *M. oryzae***

296 To confirm that the retromer complex is important for effector secretion during *M.*  
297 *oryzae*-rice interaction, we decided to conditionally inactivate the MoVps35 using



298 a chemical genetic approach. We established a tetracycline-regulated *MoVPS35*  
299 expression system by inserting a Tet-Off cassette downstream of the *MoVPS35*  
300 promoter (Fig. S8A-D). Tetracycline-regulated gene expression in fungi such as *S.*  
301 *cerevisiae*, *C. albicans*, *A. fumigatus* and *Ustilago maydis* has been widely  
302 applied [33-36], but not yet to elucidate the performance of the system during  
303 plant infection. Expression of the tetracycline-regulated *GFP-MoVPS35* gene  
304 under the control of its native promoter displayed punctate localization of the  
305 protein on endosomal membrane, consistent with the localization of  
306 *MoVps35-GFP* in the complemented strain (Fig. S9E). Addition of tetracycline or  
307 doxycycline selectively inhibited the expression of *GFP-MoVps35* during  
308 vegetative/mycelial growth (Fig. S9F). Furthermore, treatment of  
309 Tet-Off-*GFP-MoVps35/Pwl2-mCherry* strain with doxycycline delayed the  
310 mobilization of cytoplasmic content into the appressoria, and compromised lesion  
311 development on inoculated barley leaves, similar to the defects observed in  
312 *MoVPS35* deletion mutant (Fig. S9A-C, [23]). We also observed that the addition  
313 of doxycycline to conidia of the Tet-Off-*GFP-MoVps35/Pwl2-mCherry* strain  
314 resulted in a significant decrease in appressorium-mediated host penetration at  
315 28 hpi and delayed invasive growth and development at 40 hpi (Fig. S9D-F). An  
316 abnormal distribution of *Pwl2-mCherry* was also evident in these slow-growing  
317 invasive hyphae (Fig. S9D and S9G). To rule out the possibility that the defect in  
318 IH development may be the cause of the abnormal secretion of *Pwl2* effector, we  
319 allowed the Tet-Off-*GFP-MoVps35/Pwl2-mCherry* strain to invade the first rice  
320 epidermal cell before adding the doxycycline at 18 hpi. This treatment does not  
321 affect the frequency of appressorium-mediated host penetration but turns off the  
322 expression of *MoVPS35* specifically in the invasive hyphae (Fig. 6A), creating a  
323 suitable condition to study effector secretion in the infected rice cells. These  
324 results demonstrate that the conditional inactivation or knock-down of *MoVps35*



325 causes Pwl2-mCherry to appear as multiple and discrete fluorescent foci in the IH  
326 (Fig. 6A), suggesting an impaired and abnormal BIC and impaired Pwl2 effector  
327 secretion in *M. oryzae*. Next, we used the same strategy, Tet-Off, to conditionally  
328 inactivate the MoVps35 to investigate the secretion of Bas4 during plant invasion  
329 by the pathogen (Fig. S10). The results showed that the selective turn off of  
330 *MoVPS35* expression during invasive growth leads to mislocalization of the  
331 Bas4-mCherry effector into the vacuoles or cytoplasm of the invasive hyphae (Fig.  
332 6B and Fig.S10F). We conclude that the retromer complex functions in mediating  
333 effective and proper secretion of cytoplasmic and apoplastic effectors during *M.*  
334 *oryzae*-rice interaction.

335

### 336 **The MoVps35-MoSnc1 interaction is required for v-SNARE based fusion of** 337 **secretory vesicles with the plasma membrane**

338 To investigate how retromer complex regulates secretion/targeting of effectors to  
339 the plasma membrane, we immunoprecipitated MoVps35-GFP and performed  
340 liquid chromatography-tandem mass spectrometry (LC-MS/MS) to identify the  
341 binding partners. Interestingly, we found several SNARE proteins to be highly  
342 enriched in the MoVps35-GFP immunoaffinity purification assays (Table 1, Table  
343 S1). *M. oryzae* genome encodes 22 SNARE proteins, whereas 12 SNARE thereof  
344 are predicted to be associated with the retromer complex, including previously  
345 identified Syn8, which is involved in the secretion of cytoplasmic effectors [37].  
346 We noted that MoSnc1 (MGG\_12614) was the most abundant amongst these 12  
347 SNAREs (MoVps35 interactors) and was repeatedly found. In *Fusarium*  
348 *graminearum*, FgSnc1 is involved in regulating the fusion of secretory vesicles  
349 with the plasma membrane [38]. In *M. oryzae*, MoSnc1 was previously shown to  
350 accumulate at the hyphal growth zones and also in subapical BIC-associated cells  
351 [5], but its function has remained largely unexplored. In addition, the functional

352 association between the retromer complex and MoSnc1 has not been identified  
353 previously. To confirm MoVps35 association with MoSnc1 *in vivo*, we generated a  
354 strain that co-expresses GFP-MoSnc1 and MoVps35-Flag and subjected it to  
355 requisite immunoprecipitation and subsequent immunoblot analysis during  
356 vegetative and invasive growth in *M. oryzae*. A 40.5 kD band corresponding to  
357 GFP-MoSnc1 and a 102 kD band corresponding to MoVps35-Flag were identified  
358 (Fig. 7A), suggesting a positive *in vivo* interaction between the MoVps35 and  
359 MoSnc1. Live-cell imaging of *M. oryzae* strain that co-expresses MoVps35-GFP  
360 and mCherry-MoSnc1 showed partial co-localization pattern as punctate  
361 structures in vegetative hyphae, conidia and invasive hyphae (Fig. 7B). In addition  
362 to localization as punctate structures, mCherry-MoSnc1 was also present at the  
363 plasma membrane and septum in basal hyphae, while actively accumulated at the  
364 apex in growing hyphal tips (Fig. 7C, Fig. S11 and video S16), suggestive of the  
365 conserved roles of MoSnc1 in regulating the fusion of secretory vesicles with the  
366 plasma membrane. Furthermore, we found that deletion of *MoVPS35* perturbed  
367 the transport of MoSnc1 to the plasma membrane due to mis-sorting of MoSnc1  
368 to the degradation pathway (Fig. 7C). These data established that the retromer  
369 complex is able to recognize MoSnc1 at the endosomal membranes and  
370 facilitates its traffic in regulating the fusion of secretory vesicles with the plasma  
371 membrane.

372

### 373 **MoSnc1 associates with the BIC and EIHM during *M. oryzae*-rice interaction**

374 We further investigated MoSnc1 dynamics with the Pwl2 and Bas4 during *M.*  
375 *oryzae*-rice interaction, respectively. At the initial penetration stage (before 22 hpi),  
376 the GFP-MoSnc1 signal was observed at the tips of filamentous IH while  
377 Pwl2-mCherry signal was not visible at this time point, suggesting that MoSnc1  
378 expression and localization precedes that of Pwl2 (Fig. S12A). Subsequently, the

379 GFP-MoSnc1 remained concentrated/confined at the invasive hyphal tip,  
380 concomitant with the appearance of the Pwl2-mCherry (Fig. 8A, Fig. S12A), and  
381 the two signals remained in very close proximity to each other (Fig. 8A).  
382 Consistent with the observations in the IH co-expressing MoVps35-GFP and  
383 Pwl2-mCherry, the GFP-MoSnc1-labelled vesicles in the IH too moved towards  
384 the BIC and later faded away (Fig. 8B, video S17), implying a likely fusion with the  
385 plasma membrane. Remarkably, GFP-MoSnc1-labelled small vesicles trafficked  
386 out from the IH and were delivered into the BIC (Fig. 8C, video 18), suggesting  
387 that MoSnc1 could be mediating an inter-membrane trafficking from endosomes  
388 to the BIC. In addition, we confirmed that some of the GFP-MoSnc1-labelled  
389 punctae were clearly adjacent to the EIHM throughout the entire *M. oryzae*  
390 colonization process (Fig. 8D, Fig. S13, videos S19 and S20). These data led us  
391 to conclude that MoSnc1 associates with the BIC and EIHM during *M. oryzae*-rice  
392 interaction.

393

### 394 **The v-SNARE protein MoSnc1 is required for effector secretion and fungal** 395 **pathogenicity in rice blast**

396 To understand the role of MoSnc1 in effector secretion and fungal virulence, we  
397 generated *MoSNC1*-deletion mutants (Fig. S14). Phenotypic analyses on  
398 vegetative growth, conidiation and appressorium formation of the  $\Delta$ *Mosnc1*  
399 mutant did not show any large differences compared to the WT (Fig S15).  
400 Subsequently, the cytoplasmic Pwl2-mCherry and the apoplastic effector  
401 Bas4-GFP were co-expressed in the  $\Delta$ *Mosnc1* mutant. Like the retromer complex  
402 component mutants, the Bas4-GFP and the Pwl2-mCherry proteins showed  
403 aberrant secretion and mislocalized at all stages of host penetration (Fig. 9A). The  
404 increased frequency of abnormal distribution of Pwl2 in split BIC, and the  
405 mislocalization of Bas4 to the vacuole/cytosol were consistently observed (Fig.

406 9A). Additionally,  $\Delta Mosnc1$  mutant showed significant pathogenicity defects in rice  
407 and barley seedlings, whether by spray or by conidia suspension droplet  
408 inoculation (Fig. 9B-E). Reintroduction of *MoSNC1* into the  $\Delta Mosnc1$  mutant  
409 restored the full virulence of the mutant strain (Fig. 9B-E). Therefore, we conclude  
410 that MoSnc1 is critical for efficient secretion of vesicles/effectors via the  
411 cytoplasmic and apoplastic interface(s) (BIC and EIHM, respectively) and is  
412 essential for fungal pathogenicity during the devastating blast disease in rice.

413

## 414 **Discussion**

415 Phytopathogenic fungi secrete various types of effectors into the host tissue to  
416 suppress plant immunity, and promote colonization and disease [2, 3]. For the  
417 translocation of the effectors, *M. oryzae* possesses two distinct secretion  
418 pathways. The apoplastic effectors are secreted via the conventional secretion  
419 system, while the cytoplasmic effectors first accumulate at the biotrophic  
420 interfacial complex and then translocated into the host cells in an exocyst and  
421 MoSso1-dependent manner [5]. Since efficient effector secretion is critical for  
422 fungal colonization, understanding such trafficking mechanism(s) would provide  
423 new insights in the development of sustainable and broad-spectrum strategies for  
424 disease control. In this study, we provided evidence that *M. oryzae* possesses a  
425 novel effector secretion pathway mediated by the MoRab7 GTPase, the retromer  
426 complex, and the associated v-SNARE MoSnc1 (Fig. 10). During invasive growth,  
427 MoRab7 is activated and then recruits the retromer complex to the vacuolar  
428 membrane to enable the proximity of retromer to the BIC structure. After  
429 attachment to the vacuolar membrane, the retromer forms a complex with and  
430 delivers the v-SNARE MoSnc1 to the plasma membrane. After reaching the  
431 plasma membrane, MoSnc1 functions as the membrane fusion catalyst that

432 ensures the proper vesicle docking and release process required for  
433 establishment of the biotrophy associated interface/conduit for effector secretion.

434

435 Vacuole (or lysosome) is the central organelle responsible for degradation, and  
436 nutrient signaling, which plays important roles in cellular homeostasis. Vacuole  
437 receives various cargo proteins from different pathways and further decides the  
438 destiny of the cargoes to either degrade or to recycle [28, 39, 40]. Live cell  
439 imaging helped establish that a prominent vacuole is the most adjacent organelle  
440 to the BIC structure throughout *M. oryzae* invasion and colonization (Fig. 1). Since  
441 the MoRab7 GTPase is the major regulator of vacuole biogenesis and the  
442 homotypic fusion machinery [28, 41], we further investigated the association  
443 between MoRab7 and the BIC development. Our results showed that MoRab7  
444 stays in close proximity to the BIC and its dominant negative variant significantly  
445 impairs the interface leading to defects in plant infection (Fig. 2). Although the  
446 vacuole is adjacent to the BIC, we failed to observe a direct connection between  
447 the vacuole *per se* and the BIC structure. Since the vacuole has been regarded as  
448 a signal transduction center [40], we hypothesized that a trafficking machinery is  
449 likely recruited to the vacuole and is responsible for transportation between  
450 vacuole and BIC. Interestingly, the retromer complex was further identified to be  
451 such trafficking machinery between vacuole and the BIC. Retromer is normally  
452 required for retrograde trafficking of cargoes from endosomes to the Golgi, and  
453 recent studies have highlighted its role in mediating trafficking to plasma  
454 membrane too [19, 20]. However, such retromer function in the phytopathogenic  
455 fungi has remained unexplored thus far. We provide evidence that the retromer  
456 vesicles are able to attach to the plasma membrane and BIC-associated regions  
457 during invasive growth. In addition, retromer is responsible for the trafficking and  
458 membrane-targeting of the v-SNARE MoSnc1, which is required for BIC

459 development and effector secretion (Fig. 7, 8 and 9). We provide evidence that  
460 vacuole is associated with the BIC structure and the MoRab7-retromer-MoSnc1  
461 cascade is responsible for the trafficking events between the vacuole and  
462 biotrophy interface. To date, the knowledge about the relationship between  
463 vacuole and BIC have remained limited. Whether the vacuole serves as a storage  
464 hub or a regulation/recycling center for BIC development and effector secretion  
465 needs further investigation. Additionally, super-resolution live cell microscopy  
466 techniques are needed to further define the details of the vacuole-BIC association;  
467 and to define the origin and destination(s) of vesicular traffic and to differentiate  
468 various membranes at and near the biotrophy interface.

469

470 SNARE (soluble N-ethylmaleimide-sensitive factor attachment protein receptor)  
471 proteins are considered as the engine for membrane fusion events essential for  
472 various cellular processes [42]. Accumulating evidence has indicated the  
473 important roles of SNAREs in fungal development and pathogenicity of the rice  
474 blast fungus. MoSec22, an R-SNARE, was shown to be involved in cell wall  
475 integrity, conidiogenesis and pathogenicity [43]. The vacuolar SNARE MoVam7  
476 plays important roles in regulating vacuole formation and membrane trafficking  
477 needed for fungal development and virulence [44]. The t-SNARE MoSso1 is  
478 involved in the BIC structure development and cytoplasmic effector secretion [5].  
479 In addition, the syntaxin Syn8 is required for intracellular transport and secretion  
480 of avirulence effectors Avr-Pia and Avr-Pizt. However, how the SNARE proteins  
481 are regulated and the role of other SNAREs in fungal development and  
482 pathogenicity in *M. oryzae* remains unclear. Through pull down assays using  
483 MoVps35-GFP, we identified 12 SNARE proteins using mass spectrometry  
484 (Table1, Table S1), thus underlying a potential relationship between the retromer  
485 and SNARE proteins. Among these SNARE proteins, MoSnc1 was further

486 characterized and the role of MoSnc1 with retromer and its function in BIC  
487 structure development and effector secretion were uncovered. Consistent with a  
488 previous study, MoSnc1 localizes to hyphal tip, septum, plasma membrane and  
489 subapical BIC-associated cells (Fig. 8 and Fig. S12, [5] ), while it was missorted to  
490 vacuole in  $\Delta Movps35$  mutant. In addition, MoVps35 physically interacts with  
491 MoSnc1 in both vegetative and invasive growth periods (Fig. 7). These results  
492 indicated the important role of the retromer complex in intracellular trafficking of  
493 MoSnc1. Since MoSnc1 displays BIC-associated localization, we further  
494 characterized the role of MoSnc1 in effector secretion. Interestingly, MoSnc1 plays  
495 dual functions in secretion of apoplastic and cytoplasmic effectors. Similar to  
496  $\Delta Mosso1$  mutant [5], loss of MoSnc1 also disrupts the BIC structure development  
497 (Fig. 8 and Fig. 9). Thus, we shed new light on the regulatory mechanisms and  
498 the role of v-SNARE MoSnc1 in proper and timely effector secretion in *M. oryzae*.  
499 However, knowledge about the SNARE function in phytopathogens remains far  
500 from complete, and future expansion in such research will certainly further our  
501 understanding of how SNAREs function in pathogenic development and in  
502 fungus-host interaction.

503

504 Generally, proteins with signal peptides are secreted through the conventional  
505 ER-to-Golgi pathway enroute the plasma membrane. While the leaderless  
506 cargoes (proteins without signal peptide) are secreted via the unconventional  
507 pathway [8, 13]. Autophagy is an evolutionarily conserved process required for  
508 protein degradation and recent studies have expanded its role in unconventional  
509 protein secretion [45-47]. In *M. oryzae*, autophagy is thought to be involved in  
510 programmed cell death, nutrient homeostasis, and stress adaption [48, 49].  
511 However, the relationship between autophagy and the unconventional protein  
512 secretion remains largely unexplored. The sorting nexins, Rab GTPases and



513 SNARE proteins play key roles in autophagy [50-54], and are also required for  
514 pathogenicity in *M. oryzae*. The sorting nexin Snx41 is required for  
515 glutathione-based antioxidant defense and pexophagy, and loss of Snx41  
516 significantly reduces *Magnaporthe* virulence [55, 56]. MoSec4, a small Rab  
517 GTPase, is required for proper localization of the cytoplasmic effector Pwl2 [57].  
518 MoRab7 and retromer are both required for autophagy [23, 30], and we provide  
519 evidence that MoRab7-retromer-MoSnc1 cascade is essential for effector  
520 secretion in the rice blast fungus (Fig. 10). According to previous reports, various  
521 autophagy interactors play important roles in effector secretion, including vacuole  
522 protein Imp1, the Sec61 $\beta$ , endocytosis related protein MoEnd3 and the putative  
523 verprolin protein MoVrp1 [58-60]. It is possible that the autophagy process is  
524 associated with effector secretion in *M. oryzae*, and understanding of such  
525 fascinating association would shed new insights on the complex membrane  
526 trafficking events needed for precise effector secretion in phytopathogenic fungi.

527

## 528 **Materials and Methods**

### 529 **Fungal strains, medium, and growth conditions**

530 All *Magnaporthe oryzae* strains used in this study are listed in the Supporting  
531 Information Table S2. The *M. oryzae* strains were stored as dried filter paper  
532 stocks at -20°C, and cultured on complete medium (CM) and/or prune agar (PA)  
533 at 25°C under continuous light for 10 days as described previously [61].

534

### 535 **DNA manipulation and fungal transformation**

536 *M. oryzae* transformants are described in Supplemental Table S2. Details about  
537 plasmid construction are listed in Supplemental Table S3, and oligonucleotide  
538 primers provided in Supplemental Table S4. All fusion constructs were verified by  
539 DNA sequencing. Plasmids of interest were transferred to the *M. oryzae*



540 laboratory strain using *Agrobacterium tumefaciens*-mediated transformation or  
541 PEG-mediated protoplast transformation [62]. For generation of *MoSNC1* gene  
542 deletion mutants, about 1-kb upstream and downstream sequences of *MoSNC1*  
543 were amplified using specific primers (see Supplemental Table S4). We then  
544 generated the *MoSNC1* gene replacement constructs by using split-marker  
545 approach [23].

546

### 547 **Staining procedures and cytological analyses**

548 For staining of the vacuolar lumen, CMAC (7-amino-4-chloromethylcoumarin, Cat.  
549 #C2110, Invitrogen) was used at a final concentration of 10 $\mu$ M. FM4-64 (Cat.  
550 #T3166, Invitrogen) was used at a final concentration of 10  $\mu$ M for staining the  
551 Spitzenkörper, plasma membrane, septa as well as the endosomes. To examine  
552 cytological dynamics during *M. oryzae*-rice interaction, rice sheaths (cv. CO39)  
553 were inoculated with conidia from *M. oryzae* strains expressing  
554 epifluorescently-labeled effectors and/or the other indicated proteins (Table S2).  
555 Rice leaf sheath inoculation with *M. oryzae* was performed as described  
556 previously [63, 64]. In brief, leaf sheaths were detached from 4-week-old rice  
557 seedlings, and were cut into 7-8 cm segments. Inoculation was performed by  
558 injecting *M. oryzae* conidia ( $5 \times 10^4$  conidial/mL) in inner interior of rice leaf  
559 sheaths. The inoculated sheaths were placed on a 96-well PCR plate and were  
560 incubated under high humidity (95%) and at 25°C for about 20-48 hour. For  
561 microscopic inspection, the inoculated leaf sheaths were trimmed into ultrathin  
562 sections and imaged using the spinning disk confocal microscope, or Nikon A1  
563 laser scanning confocal microscope (Nikon, Japan). The spinning-disk confocal  
564 microscope was equipped with a Yokogawa CUS-X1 spinning-disk confocal  
565 system and a 100 $\times$ /1.4 $\square$ numerical aperture (NA) oil lens objective. The images  
566 were captured using a 16-bit digital Orca-Flash4.0 scientific complementary metal

567 oxide semiconductor (sCMOS) camera (Hamamatsu Photonics KK). Image  
568 processing was performed using Imaris (Bitplane) and Fiji (<https://imagej.net/Fiji>).  
569 The excitation/emission wavelengths used were 405 nm/425-475nm for CMAC,  
570 488 nm/500–550 nm for GFP, and 561 nm/570–620 nm for mCherry and FM4-64.  
571

### 572 **Affinity purification and mass spectrometric analysis**

573 For affinity purification, mycelia of the wild type Guy11, Guy11-GFP and  
574 MoVps35-GFP were harvested and ground into fine powder in liquid nitrogen. The  
575 related samples were lysed in extracted buffer (10 mM Tris HCl pH 7.5, 150 mM  
576 NaCl, 0.5 mM EDTA, 1% Triton X100, 2 mM PMSF) containing Protease Inhibitor  
577 Cocktail (Sangon Biotech, Shanghai, CN). Total proteins were inoculated with 30  
578  $\mu$ L GFP-Trap®\_A beads (ChromoTek Inc., Hauppauge, NY, USA) at 4°C for 4h  
579 and then the bound proteins eluted by heating at 100°C for 10 min. The mass  
580 spectrometric analysis was carried as previously described [38].

581

### 582 **Immunoblot and co-immunoprecipitation (Co-IP) assays**

583 For collection of vegetative hyphae, mycelial plugs of the indicated strains were  
584 cultured in CM liquid medium at 28°C, 110 rpm for 3 days. For collection of  
585 invasive hyphae, hyphal blocks of the indicated strains were inoculated on  
586 7-day-old barley leaves for 2 days. Briefly, the indicated samples were ground into  
587 fine powder and then lysed in extraction buffer containing Protease Inhibitor  
588 Cocktail (Sangon Biotech, Shanghai, CN). Total proteins were then incubated with  
589 30  $\mu$ L GFP-Trap®\_A beads (ChromoTek Inc., Hauppauge, NY, USA) at 4°C for 4h.  
590 Similarly, the bound proteins were eluted by adding protein loading buffer and  
591 then heating at 100°C for 10 min. The resulting protein samples were separated  
592 by 10% SDS-PAGE and then analyzed by western blotting with anti-GFP antibody  
593 (GFP-Tag (7G9) Mouse mAb, Abmart, Shanghai, CN), anti-Flag antibody  
594 (DYKDDDDK-Tag(3B9) mAb, Abmart, Shanghai, CN), Goat Anti-Mouse IgG HRP  
595 (Abmart, Shanghai, CN) and Anti-Myc antibody (HRP Anti-Myc tag antibody,

596 Abcam, Cambridge, MA, USA).

597

### 598 **Tet-Off gene expression system**

599 The Tet-Off system was engineered by fusing the promoter and coding region of  
600 MoVps35 to pFGL1252\_TetGFP(Hyg) vector (Addgene ID 118992), which  
601 contains a specific Tet-off cassette activated by tetracycline or doxycycline. Briefly,  
602 the promoter sequence of MoVps35 was amplified using primer MoVps35 Tet-AF  
603 and MoVps35 Tet-AR, and the resulting fragment ligated to  
604 pFGL1252\_TetGFP(Hyg) vector (digested with *Xho* I and *Eco*R I) to generate the  
605 pFGL1252\_TetGFP(Hyg)-Vps35A construct. Next, ~1500 bp coding region of  
606 MoVps35 was amplified using primers MoVps35 Tet-BF and MoVps35 Tet-BR and  
607 then ligated into pFGL1252\_TetGFP(Hyg)-Vps35A (digested with *Pst* I and *Hind*  
608 III) to generate the pFGL1252\_TetGFP(Hyg)-Vps35AB construct. The resulting  
609 construct was transformed into *M. oryzae* wild type protoplasts and the  
610 transformants were verified by PCR and sequencing in addition to the presence of  
611 the requisite epifluorescence. The correct/positive transformants were further  
612 verified by confocal microscopy and phenotype analysis with tetracycline or  
613 doxycycline treatment.

614

### 615 **Phenotypic analysis of mutants**

616 For growth assays, the indicated strains were cultured in CM, PA and SYM  
617 medium at 28°C for 10 days. Conidiation and conidiophore formation assays were  
618 performed on rice bran agar plates at 28°C with periodic exposure to 12-h  
619 light/dark cycles. To induce the formation of appressoria, conidia of the indicated  
620 strains were inoculated on hydrophobic coverslips for 8 to 24h. For plant infection  
621 assays, hyphal block or spore suspension ( $1 \times 10^5$  conidia/mL) of the indicated  
622 strains was inoculated on intact or wounded barley leaves for 5 days. For spray  
623 assays, 5 mL conidial suspension of the indicated strains ( $1 \times 10^5$  conidia/mL) were

624 inoculated on 3-week-old rice for 7 days. For invasive growth assays, spores of  
625 the indicated strains were inoculated on rice leaves sheaths at 26°C for 36h and  
626 then observed under laser confocal microscopy.

627

## 628 **Acknowledgements**

629 This work was supported by the National Science Fund for Excellent Young  
630 Scholars (32122071), the National Natural Science Foundation of China  
631 (31772106), and the Natural Science Foundation of Fujian Province  
632 (2021J06015). Research in the Naqvi lab is supported by grants from Temasek  
633 Life Sciences Laboratory and the National Research Foundation, Singapore. All  
634 authors declared no financial or other potential conflict of interest.

635

## 636 **References**

637

- 638 1. Dean R, Van Kan JA, Pretorius ZA, Hammond-Kosack KE, Di Pietro A, Spanu PD, et al. The Top 10  
639 fungal pathogens in molecular plant pathology. *Mol Plant Pathol*. 2012;13(4):414-30. Epub 2012/04/05. doi:  
640 10.1111/j.1364-3703.2011.00783.x. PubMed PMID: 22471698; PubMed Central PMCID:  
641 PMC6638784.
- 642 2. Giraldo MC, Valent B. Filamentous plant pathogen effectors in action. *Nat Rev Microbiol*.  
643 2013;11(11):800-14. Epub 2013/10/17. doi: 10.1038/nrmicro3119. PubMed PMID: 24129511.
- 644 3. Tariqjaveed M, Mateen A, Wang S, Qiu S, Zheng X, Zhang J, et al. Versatile effectors of  
645 phytopathogenic fungi target host immunity. *J Integr Plant Biol*. 2021;63(11):1856-73. Epub 2021/08/13.  
646 doi: 10.1111/jipb.13162. PubMed PMID: 34383388.
- 647 4. Fernandez J, Orth K. Rise of a Cereal Killer: The Biology of *Magnaporthe oryzae* Biotrophic Growth.  
648 *Trends Microbiol*. 2018;26(7):582-97. Epub 2018/02/06. doi: 10.1016/j.tim.2017.12.007. PubMed PMID:  
649 29395728; PubMed Central PMCID: PMC6003838.
- 650 5. Giraldo MC, Dagdas YF, Gupta YK, Mentlak TA, Yi M, Martinez-Rocha AL, et al. Two distinct  
651 secretion systems facilitate tissue invasion by the rice blast fungus *Magnaporthe oryzae*. *Nat Commun*.  
652 2013;4:1996. Epub 2013/06/19. doi: 10.1038/ncomms2996. PubMed PMID: 23774898; PubMed Central  
653 PMCID: PMC3709508.
- 654 6. Mentlak TA, Kombrink A, Shinya T, Ryder LS, Otomo I, Saitoh H, et al. Effector-mediated  
655 suppression of chitin-triggered immunity by *magnaporthe oryzae* is necessary for rice blast disease. *Plant*  
656 *Cell*. 2012;24(1):322-35. Epub 2012/01/24. doi: 10.1105/tpc.111.092957. PubMed PMID: 22267486;  
657 PubMed Central PMCID: PMC3289562.

- 658 7. Mosquera G, Giraldo MC, Khang CH, Coughlan S, Valent B. Interaction transcriptome analysis  
659 identifies *Magnaporthe oryzae* BAS1-4 as Biotrophy-associated secreted proteins in rice blast disease. *Plant*  
660 *Cell*. 2009;21(4):1273-90. Epub 2009/04/10. doi: 10.1105/tpc.107.055228. PubMed PMID: 19357089;  
661 PubMed Central PMCID: PMCPMC2685627.
- 662 8. Raote I, Malhotra V. Tunnels for Protein Export from the Endoplasmic Reticulum. *Annu Rev Biochem*.  
663 2021;90:605-30. Epub 2021/01/28. doi: 10.1146/annurev-biochem-080120-022017. PubMed PMID:  
664 33503381.
- 665 9. Liu M, Hu J, Zhang A, Dai Y, Chen W, He Y, et al. Auxilin-like protein MoSwa2 promotes effector  
666 secretion and virulence as a clathrin uncoating factor in the rice blast fungus *Magnaporthe oryzae*. *New*  
667 *Phytol*. 2021;230(2):720-36. Epub 2021/01/11. doi: 10.1111/nph.17181. PubMed PMID: 33423301;  
668 PubMed Central PMCID: PMCPMC8048681.
- 669 10. Qian B, Su X, Ye Z, Liu X, Liu M, Shen D, et al. MoErv29 promotes apoplastic effector secretion  
670 contributing to virulence of the rice blast fungus *Magnaporthe oryzae*. *New Phytol*. 2022;233(3):1289-302.  
671 Epub 2021/11/12. doi: 10.1111/nph.17851. PubMed PMID: 34761375; PubMed Central PMCID:  
672 PMCPMC8738142.
- 673 11. Rabouille C, Malhotra V, Nickel W. Diversity in unconventional protein secretion. *J Cell Sci*.  
674 2012;125(Pt 22):5251-5. Epub 2013/02/05. doi: 10.1242/jcs.103630. PubMed PMID: 23377655.
- 675 12. Rabouille C. Pathways of Unconventional Protein Secretion. *Trends Cell Biol*. 2017;27(3):230-40.  
676 Epub 2016/12/19. doi: 10.1016/j.tcb.2016.11.007. PubMed PMID: 27989656.
- 677 13. Dimou E, Nickel W. Unconventional mechanisms of eukaryotic protein secretion. *Curr Biol*.  
678 2018;28(8):R406-R10. Epub 2018/04/25. doi: 10.1016/j.cub.2017.11.074. PubMed PMID: 29689224.
- 679 14. Steringer JP, Bleicken S, Andreas H, Zacherl S, Laussmann M, Temmerman K, et al.  
680 Phosphatidylinositol 4,5-bisphosphate (PI(4,5)P<sub>2</sub>)-dependent oligomerization of fibroblast growth factor 2  
681 (FGF2) triggers the formation of a lipidic membrane pore implicated in unconventional secretion. *J Biol*  
682 *Chem*. 2012;287(33):27659-69. Epub 2012/06/26. doi: 10.1074/jbc.M112.381939. PubMed PMID:  
683 22730382; PubMed Central PMCID: PMCPMC3431657.
- 684 15. Moskes C, Burghaus PA, Wernli B, Sauder U, Durrenberger M, Kappes B. Export of *Plasmodium*  
685 *falciparum* calcium-dependent protein kinase 1 to the parasitophorous vacuole is dependent on three  
686 N-terminal membrane anchor motifs. *Mol Microbiol*. 2004;54(3):676-91. Epub 2004/10/20. doi:  
687 10.1111/j.1365-2958.2004.04313.x. PubMed PMID: 15491359.
- 688 16. Kinseth MA, Anjard C, Fuller D, Guizzunti G, Loomis WF, Malhotra V. The Golgi-associated protein  
689 GRASP is required for unconventional protein secretion during development. *Cell*. 2007;130(3):524-34.  
690 Epub 2007/07/28. doi: 10.1016/j.cell.2007.06.029. PubMed PMID: 17655921.
- 691 17. Zhang M, Kenny SJ, Ge L, Xu K, Schekman R. Translocation of interleukin-1beta into a vesicle  
692 intermediate in autophagy-mediated secretion. *Elife*. 2015;4. Epub 2015/11/03. doi: 10.7554/eLife.11205.  
693 PubMed PMID: 26523392; PubMed Central PMCID: PMCPMC4728131.
- 694 18. Grieve AG, Rabouille C. Golgi bypass: skirting around the heart of classical secretion. *Cold Spring*  
695 *Harb Perspect Biol*. 2011;3(4). Epub 2011/03/29. doi: 10.1101/cshperspect.a005298. PubMed PMID:  
696 21441587; PubMed Central PMCID: PMCPMC3062214.

- 697 19. Chen KE, Healy MD, Collins BM. Towards a molecular understanding of endosomal trafficking by  
698 Retromer and Retriever. *Traffic*. 2019;20(7):465-78. Epub 2019/04/18. doi: 10.1111/tra.12649. PubMed  
699 PMID: 30993794.
- 700 20. Seaman MNJ. The Retromer Complex: From Genesis to Revelations. *Trends Biochem Sci*.  
701 2021;46(7):608-20. Epub 2021/02/03. doi: 10.1016/j.tibs.2020.12.009. PubMed PMID: 33526371.
- 702 21. Muhammad A, Flores I, Zhang H, Yu R, Staniszewski A, Planel E, et al. Retromer deficiency observed  
703 in Alzheimer's disease causes hippocampal dysfunction, neurodegeneration, and Abeta accumulation. *Proc*  
704 *Natl Acad Sci U S A*. 2008;105(20):7327-32. Epub 2008/05/16. doi: 10.1073/pnas.0802545105. PubMed  
705 PMID: 18480253; PubMed Central PMCID: PMCPMC2386077.
- 706 22. Wang J, Fedoseienko A, Chen B, Burstein E, Jia D, Billadeau DD. Endosomal receptor trafficking:  
707 Retromer and beyond. *Traffic*. 2018;19(8):578-90. Epub 2018/04/19. doi: 10.1111/tra.12574. PubMed  
708 PMID: 29667289; PubMed Central PMCID: PMCPMC6043395.
- 709 23. Zheng W, Zhou J, He Y, Xie Q, Chen A, Zheng H, et al. Retromer Is Essential for  
710 Autophagy-Dependent Plant Infection by the Rice Blast Fungus. *PLoS Genet*. 2015;11(12):e1005704. Epub  
711 2015/12/15. doi: 10.1371/journal.pgen.1005704. PubMed PMID: 26658729; PubMed Central PMCID:  
712 PMCPMC4686016.
- 713 24. Zheng H, Guo Z, Xi Y, Yuan M, Lin Y, Wu C, et al. Sorting nexin (MoVps17) is required for fungal  
714 development and plant infection by regulating endosome dynamics in the rice blast fungus. *Environ*  
715 *Microbiol*. 2017;19(10):4301-17. Epub 2017/08/25. doi: 10.1111/1462-2920.13896. PubMed PMID:  
716 28836715.
- 717 25. Wu C, Lin Y, Zheng H, Abubakar YS, Peng M, Li J, et al. The retromer CSC subcomplex is recruited  
718 by MoYpt7 and sequentially sorted by MoVps17 for effective conidiation and pathogenicity of the rice  
719 blast fungus. *Mol Plant Pathol*. 2021;22(2):284-98. Epub 2020/12/23. doi: 10.1111/mpp.13029. PubMed  
720 PMID: 33350057; PubMed Central PMCID: PMCPMC7814966.
- 721 26. Rojas R, van Vlijmen T, Mardones GA, Prabhu Y, Rojas AL, Mohammed S, et al. Regulation of  
722 retromer recruitment to endosomes by sequential action of Rab5 and Rab7. *J Cell Biol*. 2008;183(3):513-26.  
723 Epub 2008/11/05. doi: 10.1083/jcb.200804048. PubMed PMID: 18981234; PubMed Central PMCID:  
724 PMCPMC2575791.
- 725 27. Abubakar YS, Qiu H, Fang W, Zheng H, Lu G, Zhou J, et al. FgRab5 and FgRab7 are essential for  
726 endosomes biogenesis and non-redundantly recruit the retromer complex to the endosomes in *Fusarium*  
727 *graminearum*. *Stress Biology*. 2021;1(1). doi: 10.1007/s44154-021-00020-3.
- 728 28. Yang C, Wang X. Lysosome biogenesis: Regulation and functions. *J Cell Biol*. 2021;220(6). Epub  
729 2021/05/06. doi: 10.1083/jcb.202102001. PubMed PMID: 33950241; PubMed Central PMCID:  
730 PMCPMC8105738.
- 731 29. Borchers AC, Langemeyer L, Ungermann C. Who's in control? Principles of Rab GTPase activation in  
732 endolysosomal membrane trafficking and beyond. *J Cell Biol*. 2021;220(9). Epub 2021/08/13. doi:  
733 10.1083/jcb.202105120. PubMed PMID: 34383013; PubMed Central PMCID: PMCPMC8366711.
- 734 30. Liu XH, Chen SM, Gao HM, Ning GA, Shi HB, Wang Y, et al. The small GTPase MoYpt7 is required  
735 for membrane fusion in autophagy and pathogenicity of *Magnaporthe oryzae*. *Environ Microbiol*.  
736 2015;17(11):4495-510. Epub 2015/05/21. doi: 10.1111/1462-2920.12903. PubMed PMID: 25991510.



- 737 31. Sweigard JA, Carroll AM, Kang S, Farrall L, Chumley FG, Valent B. Identification, cloning, and  
738 characterization of PWL2, a gene for host species specificity in the rice blast fungus. *Plant Cell*.  
739 1995;7(8):1221-33. Epub 1995/08/01. doi: 10.1105/tpc.7.8.1221. PubMed PMID: 7549480; PubMed  
740 Central PMCID: PMCPMC160946.
- 741 32. Kankanala P, Czymmek K, Valent B. Roles for rice membrane dynamics and plasmodesmata during  
742 biotrophic invasion by the blast fungus. *Plant Cell*. 2007;19(2):706-24. Epub 2007/02/27. doi:  
743 10.1105/tpc.106.046300. PubMed PMID: 17322409; PubMed Central PMCID: PMCPMC1867340.
- 744 33. Zarnack K, Maurer S, Kaffarnik F, Ladendorf O, Brachmann A, Kamper J, et al.  
745 Tetracycline-regulated gene expression in the pathogen *Ustilago maydis*. *Fungal Genet Biol*.  
746 2006;43(11):727-38. Epub 2006/07/18. doi: 10.1016/j.fgb.2006.05.006. PubMed PMID: 16843015.
- 747 34. Wanka F, Cairns T, Boecker S, Berens C, Happel A, Zheng X, et al. Tet-on, or Tet-off, that is the  
748 question: Advanced conditional gene expression in *Aspergillus*. *Fungal Genet Biol*. 2016;89:72-83. Epub  
749 2015/11/12. doi: 10.1016/j.fgb.2015.11.003. PubMed PMID: 26555930.
- 750 35. Garí E, Piedrafita L, Aldea M, Herrero E. A Set of Vectors with a Tetracycline-Regulatable Promoter  
751 System for Modulated Gene Expression in *Saccharomyces cerevisiae*. *Yeast*. 1997;13(9):837-48. doi:  
752 10.1002/(sici)1097-0061(199707)13:9<837::Aid-yea145>3.0.Co;2-t.
- 753 36. Park YN, Morschhauser J. Tetracycline-inducible gene expression and gene deletion in *Candida*  
754 *albicans*. *Eukaryot Cell*. 2005;4(8):1328-42. Epub 2005/08/10. doi: 10.1128/EC.4.8.1328-1342.2005.  
755 PubMed PMID: 16087738; PubMed Central PMCID: PMCPMC1214539.
- 756 37. Qi Z, Liu M, Dong Y, Zhu Q, Li L, Li B, et al. The syntaxin protein (MoSyn8) mediates intracellular  
757 trafficking to regulate conidiogenesis and pathogenicity of rice blast fungus. *New Phytol*.  
758 2016;209(4):1655-67. Epub 2015/11/03. doi: 10.1111/nph.13710. PubMed PMID: 26522477.
- 759 38. Zheng W, Lin Y, Fang W, Zhao X, Lou Y, Wang G, et al. The endosomal recycling of FgSncl by  
760 FgSnx41-FgSnx4 heterodimer is essential for polarized growth and pathogenicity in *Fusarium*  
761 *graminearum*. *New Phytol*. 2018;219(2):654-71. Epub 2018/04/21. doi: 10.1111/nph.15178. PubMed PMID:  
762 29676464.
- 763 39. Cullen PJ, Steinberg F. To degrade or not to degrade: mechanisms and significance of endocytic  
764 recycling. *Nat Rev Mol Cell Biol*. 2018;19(11):679-96. Epub 2018/09/09. doi: 10.1038/s41580-018-0053-7.  
765 PubMed PMID: 30194414.
- 766 40. Perera RM, Zoncu R. The Lysosome as a Regulatory Hub. *Annu Rev Cell Dev Biol*. 2016;32:223-53.  
767 Epub 2016/08/09. doi: 10.1146/annurev-cellbio-111315-125125. PubMed PMID: 27501449.
- 768 41. Balderhaar HJ, Arlt H, Ostrowicz C, Brocker C, Sundermann F, Brandt R, et al. The Rab GTPase Ypt7  
769 is linked to retromer-mediated receptor recycling and fusion at the yeast late endosome. *J Cell Sci*.  
770 2010;123(Pt 23):4085-94. Epub 2010/11/11. doi: 10.1242/jcs.071977. PubMed PMID: 21062894.
- 771 42. Jahn R, Scheller RH. SNAREs--engines for membrane fusion. *Nat Rev Mol Cell Biol*.  
772 2006;7(9):631-43. Epub 2006/08/17. doi: 10.1038/nrm2002. PubMed PMID: 16912714.
- 773 43. Song W, Dou X, Qi Z, Wang Q, Zhang X, Zhang H, et al. R-SNARE homolog MoSec22 is required  
774 for conidiogenesis, cell wall integrity, and pathogenesis of *Magnaporthe oryzae*. *PLoS One*.  
775 2010;5(10):e13193. Epub 2010/10/16. doi: 10.1371/journal.pone.0013193. PubMed PMID: 20949084;  
776 PubMed Central PMCID: PMCPMC2950850.

- 777 44. Dou X, Wang Q, Qi Z, Song W, Wang W, Guo M, et al. MoVam7, a conserved SNARE involved in  
778 vacuole assembly, is required for growth, endocytosis, ROS accumulation, and pathogenesis of  
779 *Magnaporthe oryzae*. *PLoS One*. 2011;6(1):e16439. Epub 2011/02/02. doi: 10.1371/journal.pone.0016439.  
780 PubMed PMID: 21283626; PubMed Central PMCID: PMCPMC3025985.
- 781 45. Galluzzi L, Green DR. Autophagy-Independent Functions of the Autophagy Machinery. *Cell*.  
782 2019;177(7):1682-99. Epub 2019/06/15. doi: 10.1016/j.cell.2019.05.026. PubMed PMID: 31199916;  
783 PubMed Central PMCID: PMCPMC7173070.
- 784 46. Chang C, Jensen LE, Hurley JH. Autophagosome biogenesis comes out of the black box. *Nat Cell*  
785 *Biol*. 2021;23(5):450-6. Epub 2021/04/28. doi: 10.1038/s41556-021-00669-y. PubMed PMID: 33903736;  
786 PubMed Central PMCID: PMCPMC8122082.
- 787 47. Raudenska M, Balvan J, Masarik M. Crosstalk between autophagy inhibitors and endosome-related  
788 secretory pathways: a challenge for autophagy-based treatment of solid cancers. *Mol Cancer*.  
789 2021;20(1):140. Epub 2021/10/29. doi: 10.1186/s12943-021-01423-6. PubMed PMID: 34706732; PubMed  
790 Central PMCID: PMCPMC8549397.
- 791 48. Kershaw MJ, Talbot NJ. Genome-wide functional analysis reveals that infection-associated fungal  
792 autophagy is necessary for rice blast disease. *Proc Natl Acad Sci U S A*. 2009;106(37):15967-72. Epub  
793 2009/09/01. doi: 10.1073/pnas.0901477106. PubMed PMID: 19717456; PubMed Central PMCID:  
794 PMCPMC2747227.
- 795 49. Deng YZ, Naqvi NI. Metabolic Basis of Pathogenesis and Host Adaptation in Rice Blast. *Annu Rev*  
796 *Microbiol*. 2019;73:601-19. Epub 2019/07/10. doi: 10.1146/annurev-micro-020518-115810. PubMed  
797 PMID: 31283431.
- 798 50. Ao X, Zou L, Wu Y. Regulation of autophagy by the Rab GTPase network. *Cell Death Differ*.  
799 2014;21(3):348-58. Epub 2014/01/21. doi: 10.1038/cdd.2013.187. PubMed PMID: 24440914; PubMed  
800 Central PMCID: PMCPMC3921601.
- 801 51. Zhao YG, Codogno P, Zhang H. Machinery, regulation and pathophysiological implications of  
802 autophagosome maturation. *Nat Rev Mol Cell Biol*. 2021;22(11):733-50. Epub 2021/07/25. doi:  
803 10.1038/s41580-021-00392-4. PubMed PMID: 34302147; PubMed Central PMCID: PMCPMC8300085.
- 804 52. Moreau K, Renna M, Rubinsztein DC. Connections between SNAREs and autophagy. *Trends*  
805 *Biochem Sci*. 2013;38(2):57-63. Epub 2013/01/12. doi: 10.1016/j.tibs.2012.11.004. PubMed PMID:  
806 23306003.
- 807 53. Yu L, Chen Y, Tooze SA. Autophagy pathway: Cellular and molecular mechanisms. *Autophagy*.  
808 2018;14(2):207-15. Epub 2017/09/22. doi: 10.1080/15548627.2017.1378838. PubMed PMID: 28933638;  
809 PubMed Central PMCID: PMCPMC5902171.
- 810 54. Hanley SE, Cooper KF. Sorting Nexins in Protein Homeostasis. *Cells*. 2020;10(1). Epub 2020/12/31.  
811 doi: 10.3390/cells10010017. PubMed PMID: 33374212; PubMed Central PMCID: PMCPMC7823608.
- 812 55. Deng YZ, Qu Z, He Y, Naqvi NI. Sorting nexin Snx41 is essential for conidiation and mediates  
813 glutathione-based antioxidant defense during invasive growth in *Magnaporthe oryzae*. *Autophagy*.  
814 2012;8(7):1058-70. Epub 2012/05/09. doi: 10.4161/auto.20217. PubMed PMID: 22561104; PubMed  
815 Central PMCID: PMCPMC3429543.



- 816 56. Deng Y, Qu Z, Naqvi NI. The role of snx41-based pexophagy in magnaporthe development. *PLoS*  
817 *One*. 2013;8(11):e79128. Epub 2013/12/05. doi: 10.1371/journal.pone.0079128. PubMed PMID: 24302988;  
818 PubMed Central PMCID: PMC3841179.
- 819 57. Zheng H, Chen S, Chen X, Liu S, Dang X, Yang C, et al. The Small GTPase MoSec4 Is Involved in  
820 Vegetative Development and Pathogenicity by Regulating the Extracellular Protein Secretion in  
821 *Magnaporthe oryzae*. *Front Plant Sci*. 2016;7:1458. Epub 2016/10/13. doi: 10.3389/fpls.2016.01458.  
822 PubMed PMID: 27729922; PubMed Central PMCID: PMC5037964.
- 823 58. Li X, Gao C, Li L, Liu M, Yin Z, Zhang H, et al. MoEnd3 regulates appressorium formation and  
824 virulence through mediating endocytosis in rice blast fungus *Magnaporthe oryzae*. *PLoS Pathog*.  
825 2017;13(6):e1006449. Epub 2017/06/20. doi: 10.1371/journal.ppat.1006449. PubMed PMID: 28628655;  
826 PubMed Central PMCID: PMC5491321.
- 827 59. Wei YY, Liang S, Zhang YR, Lu JP, Lin FC, Liu XH. MoSec61beta, the beta subunit of Sec61, is  
828 involved in fungal development and pathogenicity, plant immunity, and ER-phagy in *Magnaporthe oryzae*.  
829 *Virulence*. 2020;11(1):1685-700. Epub 2020/11/18. doi: 10.1080/21505594.2020.1848983. PubMed PMID:  
830 33200669; PubMed Central PMCID: PMC7714445.
- 831 60. Huang L, Zhang S, Yin Z, Liu M, Li B, Zhang H, et al. MoVrp1, a putative verprolin protein, is  
832 required for asexual development and infection in the rice blast fungus *Magnaporthe oryzae*. *Sci Rep*.  
833 2017;7:41148. Epub 2017/01/25. doi: 10.1038/srep41148. PubMed PMID: 28117435; PubMed Central  
834 PMCID: PMC5259722.
- 835 61. Chen J, Zheng W, Zheng S, Zhang D, Sang W, Chen X, et al. Rac1 is required for pathogenicity and  
836 Chml1-dependent conidiogenesis in rice fungal pathogen *Magnaporthe grisea*. *PLoS Pathog*.  
837 2008;4(11):e1000202. Epub 2008/11/15. doi: 10.1371/journal.ppat.1000202. PubMed PMID: 19008945;  
838 PubMed Central PMCID: PMC2575402.
- 839 62. Khang CH, Park SY, Rho HS, Lee YH, Kang S. Filamentous Fungi (*Magnaporthe grisea* and  
840 *Fusarium oxysporum*). *Methods Mol Biol*. 2006;344:403-20. Epub 2006/10/13. doi:  
841 10.1385/1-59745-131-2:403. PubMed PMID: 17033082.
- 842 63. Khang CH, Berruyer R, Giraldo MC, Kankanala P, Park SY, Czymmek K, et al. Translocation of  
843 *Magnaporthe oryzae* effectors into rice cells and their subsequent cell-to-cell movement. *Plant Cell*.  
844 2010;22(4):1388-403. Epub 2010/05/04. doi: 10.1105/tpc.109.069666. PubMed PMID: 20435900; PubMed  
845 Central PMCID: PMC2879738.
- 846 64. Park CH, Chen S, Shirsekar G, Zhou B, Khang CH, Songkumarn P, et al. The *Magnaporthe oryzae*  
847 effector AvrPiz-t targets the RING E3 ubiquitin ligase APIP6 to suppress pathogen-associated molecular  
848 pattern-triggered immunity in rice. *Plant Cell*. 2012;24(11):4748-62. Epub 2012/12/04. doi:  
849 10.1105/tpc.112.105429. PubMed PMID: 23204406; PubMed Central PMCID: PMC3531864.

850

## Rab7/Retromer-based endolysosomal trafficking facilitates effector secretion and host invasion in rice blast

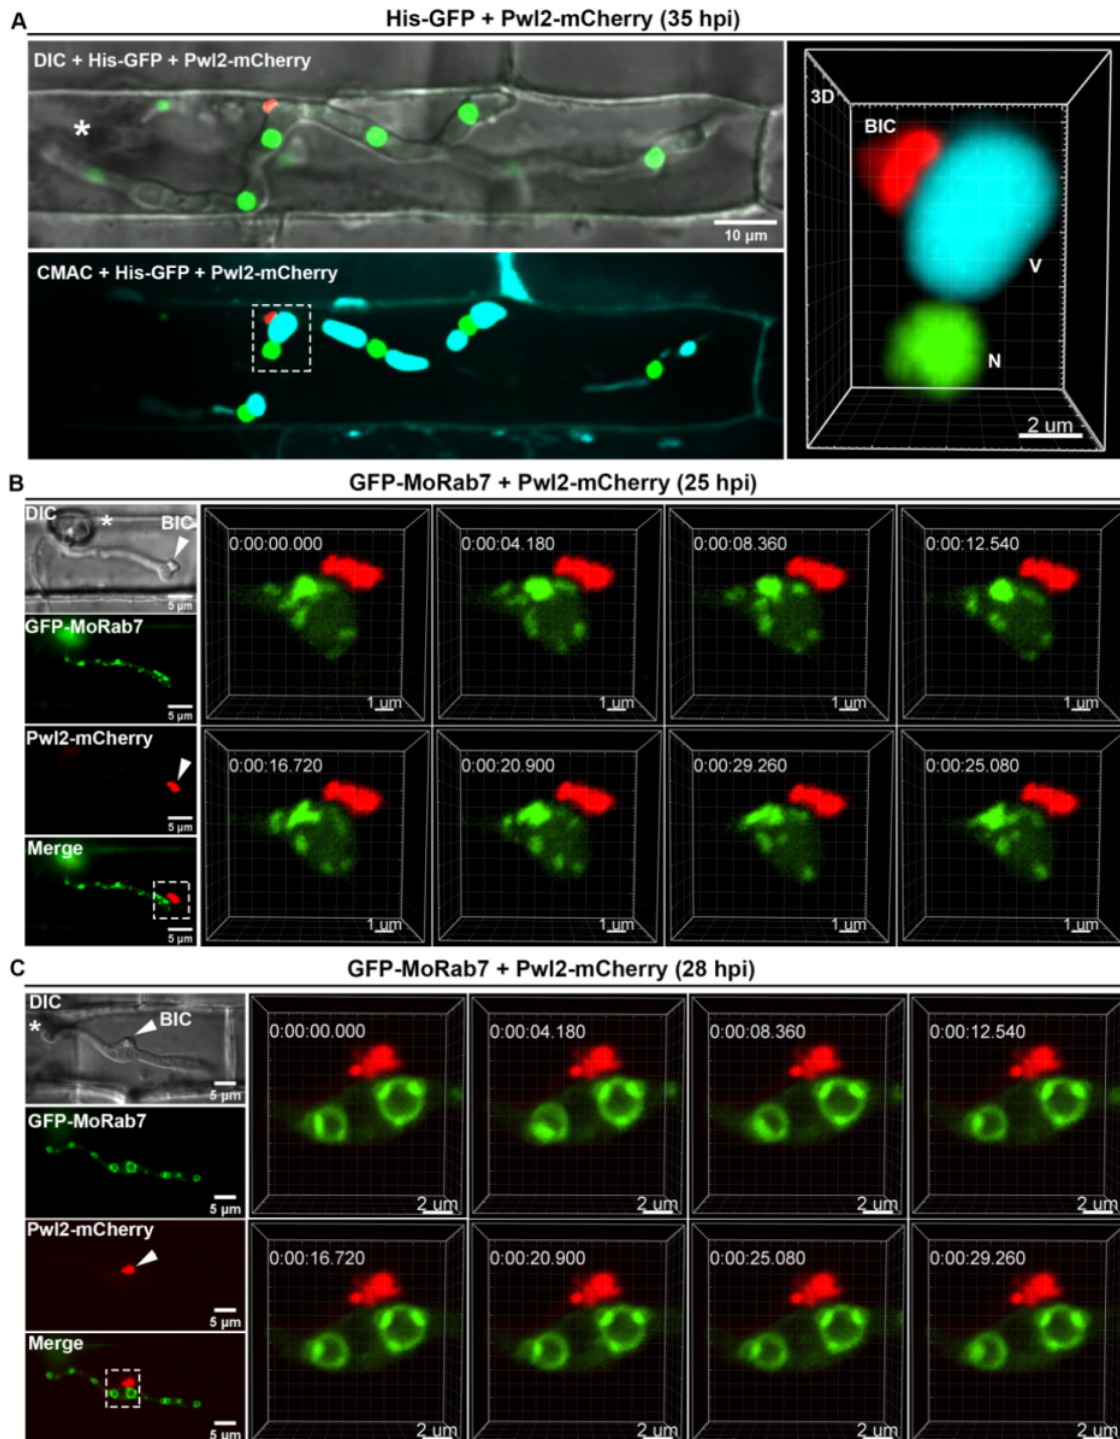

**Figure 1. Close association of MoRab7 with the host interphase (Biotrophy Interfacial Complex; BIC) during invasion. (A)** A relatively large vacuole often adjacent to the BIC during host invasion. A 3D (three-dimensional) image showing

spatial positioning of the BIC, vacuole and nucleus (see also Supplementary video 1). His-GFP and Pwl2-mCherry were used to visualize the nuclei and BIC, respectively, while CMAC (7-amino-4-chloromethylcoumarin) was used to selectively stain the lumen of vacuoles. (B) At the early infection stage (25 hpi, hours post inoculation), GFP-Rab7 vesicles are abundant in the primary invasive hyphae (IH) and remain adjacent to the BIC (boxed region). Time-lapse imaging (four-dimensional) shows the dynamic trafficking/association between GFP-Rab7 and the BIC (Inset panels on the right; and Supplementary video 2). (C) At the later infection stage (28 hpi), GFP-MoRab7 mainly localizes to the vacuolar membrane in the bulbous IH adjacent to the BIC. Panels on the right depict the dynamic movement of the GFP-MoRab7 and the BIC (Supplementary video 3). DIC: differential interference contrast. Asterisks indicate appressoria. Arrowheads point to the BIC.

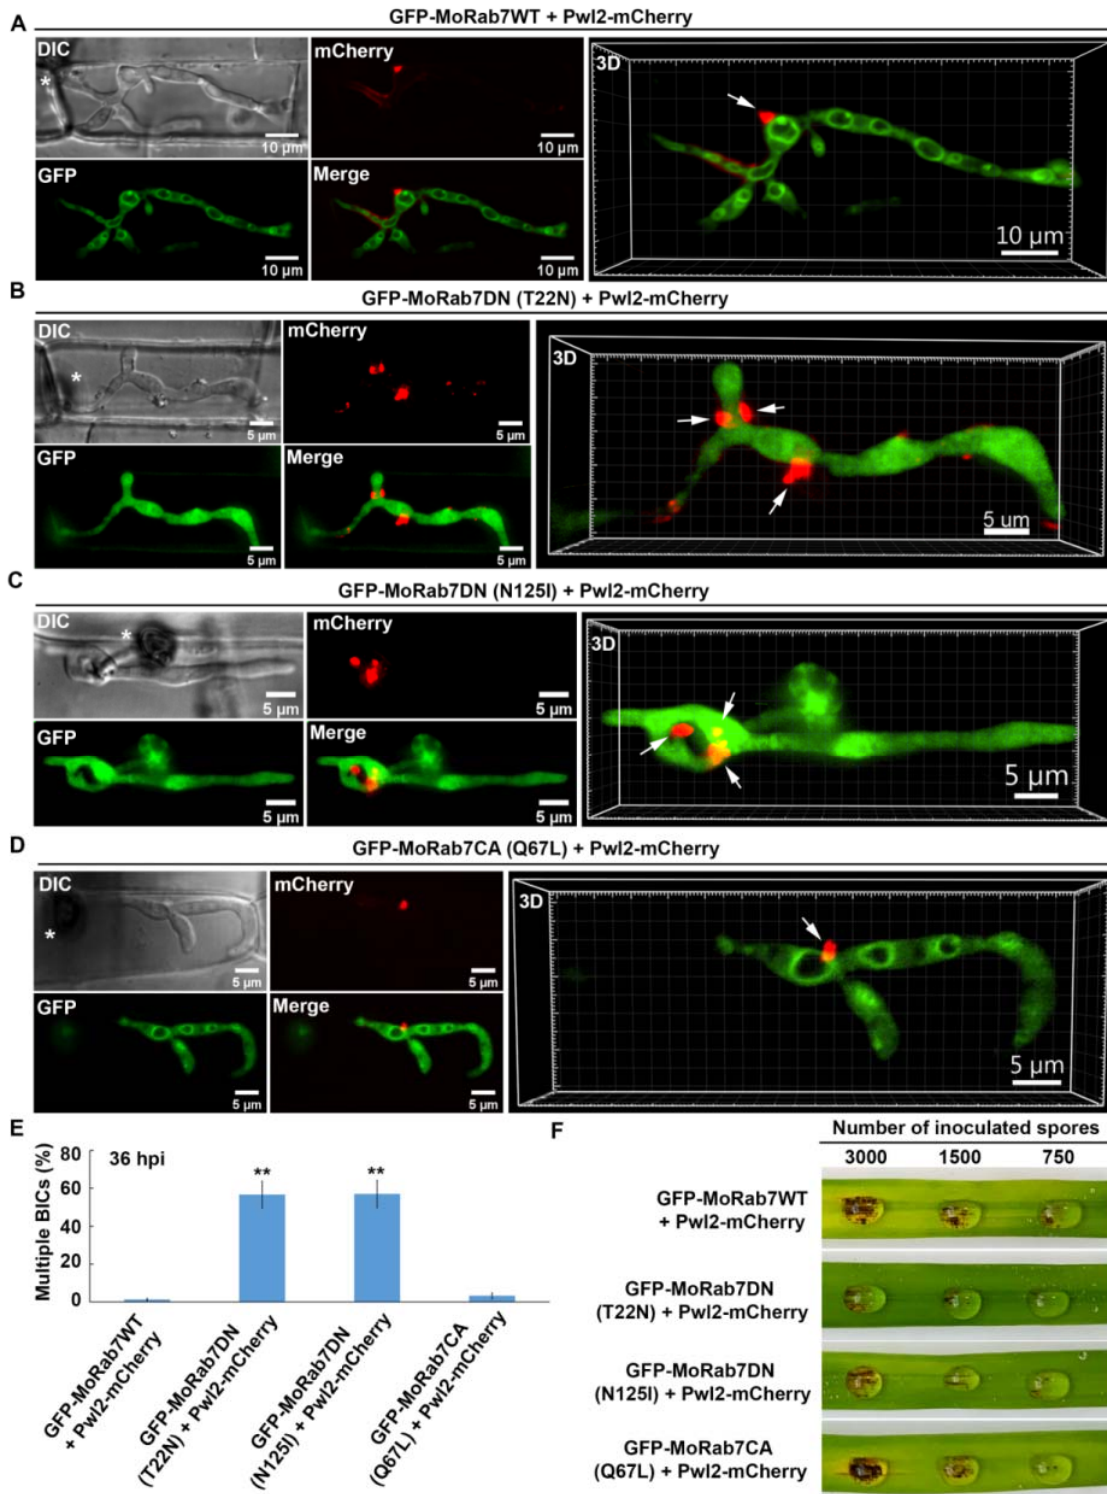

**Figure 2. Inhibiting the GTPase activity of MoRab7 affects proper establishment of the host interface (BIC) and plant infection in the rice blast fungus.** (A) Expression of GFP-MoRab7 in the wild-type (WT) under the control of *PWL2* promoter shows normal vacuolar localization, and MoRab7 is in close

proximity with and adjacent to the BIC (Supplementary video 4). (B) Expression of a dominant-negative GFP-MoRab7 via T22N mutation (locked in GDP-bound state) under the control of *PWL2* promoter results in the failure of MoRab7 to target the vacuolar membrane, impairs effector secretion and produces abnormal BICs. Multiple and discrete fluorescent foci (Pwl2-mCherry, arrows) are observed in the invasive hyphae (Supplementary video 5) in the DN mutant instead of the singular and highly specialized BIC region found in the GFP-MoRab7WT. (C) Another dominant-negative mutation (N125I) of MoRab7 shows enrichment of the protein in the cytosol and causes similar aberrant secretion of Pwl2-mCherry (Supplementary video 6). (D) Constitutively active GFP-MoRab7<sup>Q67L</sup> (GTP form) does not show any defects in vacuole localization and BIC development (Supplementary video 7). (E) A bar chart showing the percentage BICs formed in the IH of each of the indicated strain. (\*\*P < 0.01; Student's *t* test; three biological replicates; n=300 invaded cells in total). (F) Blast infection assays showing that the GTPase activity of MoRab7 is required for the fungal pathogenicity. Asterisks indicate appressoria. Arrows point to the BICs.





time (Supplementary video 8). The vacuoles appear hollow in the DIC image. Asterisks indicate appressoria. White arrows point to the BICs.

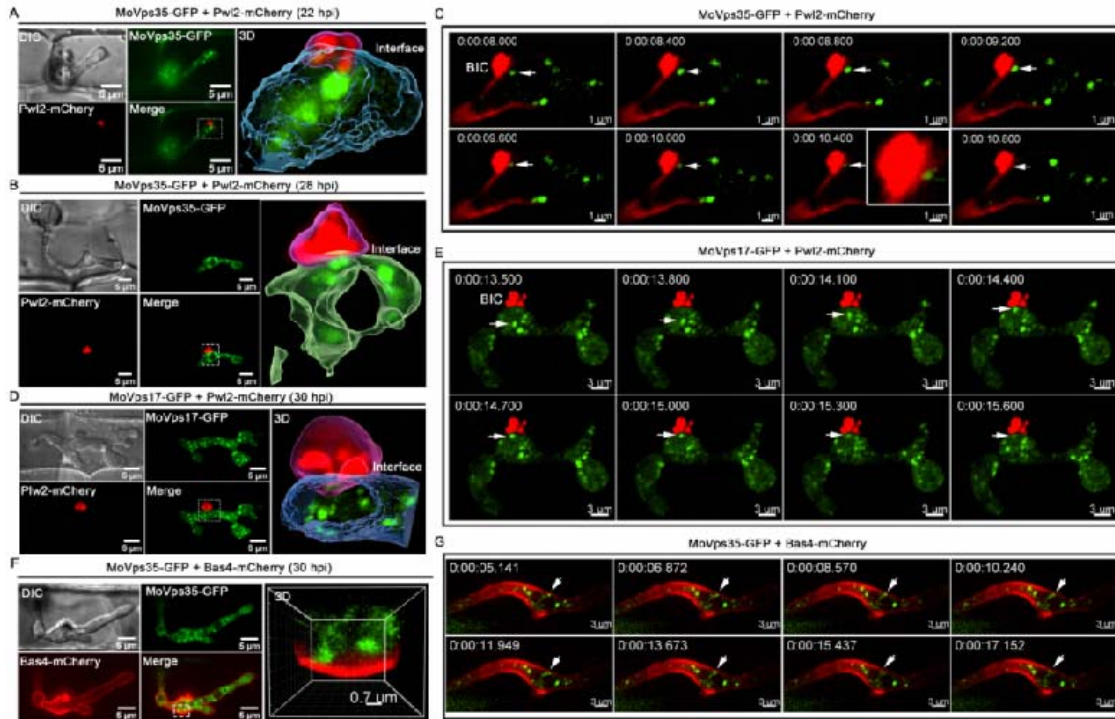

**Figure 4. Association of the endosomal sorting machinery, retromer complex, with BIC and EIHM during host invasion.** (A) Confocal micrographs of filamentous primary invasive hyphae expressing MoVps35-GFP (an indispensable retromer subunit) and Pwl2-mCherry (BIC-specific marker) at 22 hpi. At the hyphal tip, the retromer is distinctly adjacent to the BIC (see boxed region). The 3D image (right panel) positioning of the vesicular cargo sorting machinery (MoVps35-GFP) and the BIC (Pwl2-mCherry) at the host interface (Supplementary video 9). Image processing was performed using Imaris 9.5 with the surface rendering tool. (B) At 28 hpi, the filamentous primary IH develop into bulbous hyphae wherein MoVps35 localizes to the vacuolar membrane adjacent to the BIC (Supplementary video 10). (C) Time-lapse confocal imaging of the MoVps35-GFP and Pwl2-mCherry in the bulbous infection hyphae. Notably, a MoVps35-GFP-labelled vesicle (diameter  $\leq 0.5 \mu\text{m}$ ; arrow) in the IH moved towards and/or transiently fused with the BIC-associated interface (Supplementary video 11). The instant contact point is depicted in the detailed view (see time 0:00:10:400). Images are shown at 400 millisecond

intervals. (D) Visualization of infectious hyphae expressing MoVps17-GFP (the retromer-associated sorting nexin) and Pwl2-mCherry at the bulbous IH (30 hpi). MoVps17-GFP also localizes to distinct vesicles that are clearly adjacent to the BIC (see dotted box). The 3D rendered image (right panel) shows the retromer sorting machinery (MoVps17-GFP) proximal to the BIC (Pwl2-mCherry) at the interface. (E) Time-lapse confocal microscopy of the bulbous invasive hyphae of the MoVps17-GFP Pwl2-mCherry strain. Consistent with MoVps35-GFP, the MoVps17-GFP-labelled vesicle (arrow) moves dynamically to the BIC-associated plasma membrane of the invasive hyphae (Supplementary video 12). Images are shown at 300-ms intervals. (F) The retromer also associates with the sites of secretion of the apoplastic effectors. Micrographs depicting the localization of MoVps35-GFP and Bas4-mCherry (EIHM/apoplast-specific marker) within the bulbous IH (30 hpi). MoVps35-GFP localizes to some distinct punctate structures, some of which are clearly adjacent to the EIHM (see boxed region). The 3D rendition (right panel) shows an intimate positioning of the MoVps35-GFP and the Bas4-mCherry marked EIHM (Supplementary video 14). (G) Time-lapse confocal imaging of the bulbous infection hyphae expressing MoVps35-GFP and Bas4-mCherry. A MoVps35-GFP-labelled vesicle (arrow) in the IH was clearly observed moving to the EIHM and gradually fades away (Supplementary video 15).



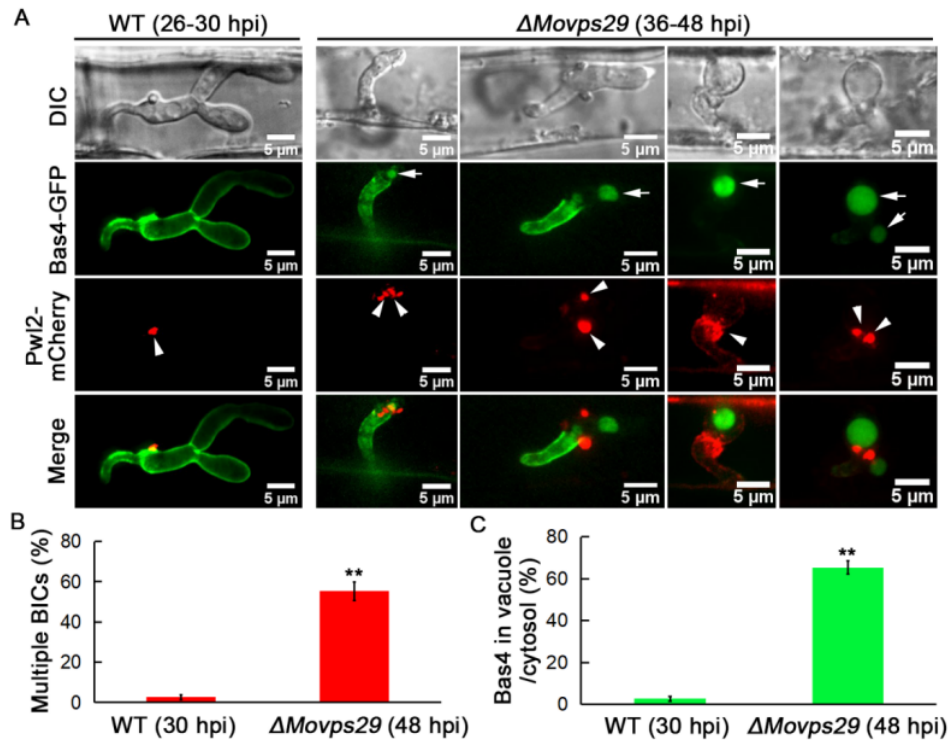

**Figure 5. Disruption of the retromer complex impairs secretion of both apoplasmic and cytoplasmic effectors.** (A) Bas4-GFP (apoplasmic) and Pwl2-mCherry (cytoplasmic) were improperly secreted and mislocalized in the  $\Delta Movps29$  mutant. In the WT, Bas4-GFP shows apoplasmic localization, outlining the invasive hyphae, while it often accumulates inside the vacuole (arrows) in the  $\Delta Movps29$  mutant. Pwl2-mCherry appeared as multiple and discrete fluorescent foci (arrowheads) in the  $\Delta Movps29$  invasive hyphae, instead of focussed and specialized BIC observed in the WT. (B) A bar chart showing the percentage of IH containing multiple BICs in the WT and  $\Delta Movps29$  mutant. (C) A bar chart showing the percentage of IH containing vacuolar Bas4 in the indicated strains. (\*\*P < 0.01; Student's *t* test; three biological replicates; n=150 invaded cells in total).

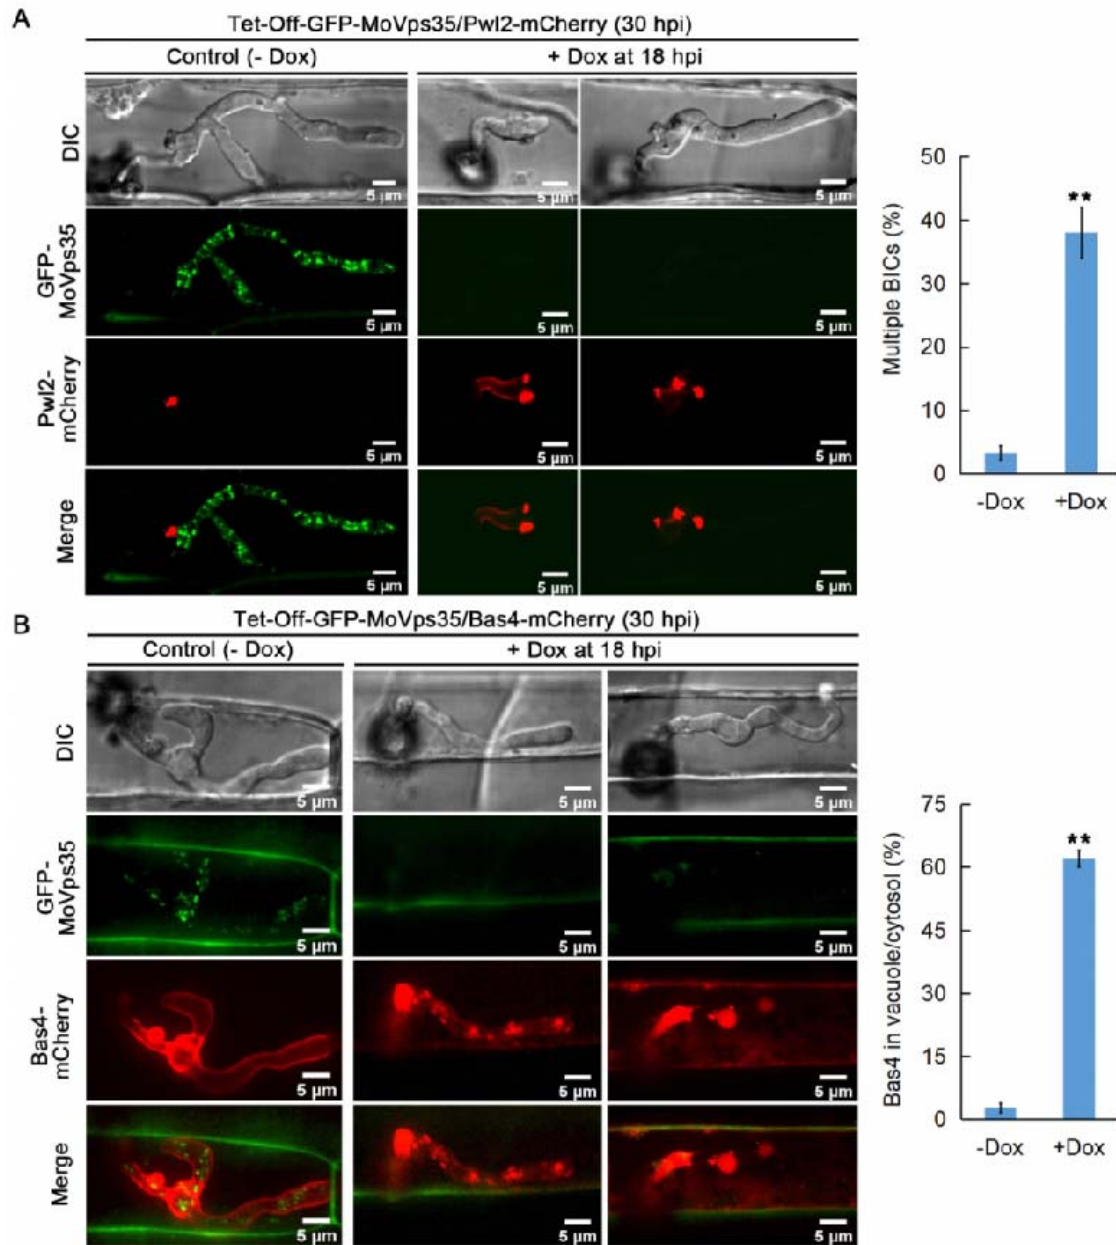

**Figure 6. Conditional inactivation of retromer/*MoVPS35* function impairs interface establishment and effector secretion in *M. oryzae*.** (A) Addition of Dox to the Tet-Off-GFP-MoVps35/Pwl2-mCherry strain blocked MoVps35 expression and results in a significantly increased number of BICs in the invasive hyphae. The bar chart shows the percentage of IH containing multiple BICs at 30 hpi after treatment with 50  $\mu\text{g/ml}$  Dox at 18 hpi (\*\* $P < 0.01$ ; Student's  $t$  test; three biological replicates; 150 infected cells observed). (B) Addition of Dox to the Tet-Off-GFP-MoVps35/Bas4-mCherry strain blocked MoVps35 expression and concurrently caused Bas4-mCherry effector miss-localization into the vacuole or cytosol of the IH. The bar chart

shows the percentage of IH containing vacuolar/cytosol Bas4 at 30 hpi after treatment with 50  $\mu$ g/ml Dox at 18 hpi (\*\*P < 0.01; Student's *t* test; three biological replicates; 150 infected cells observed).

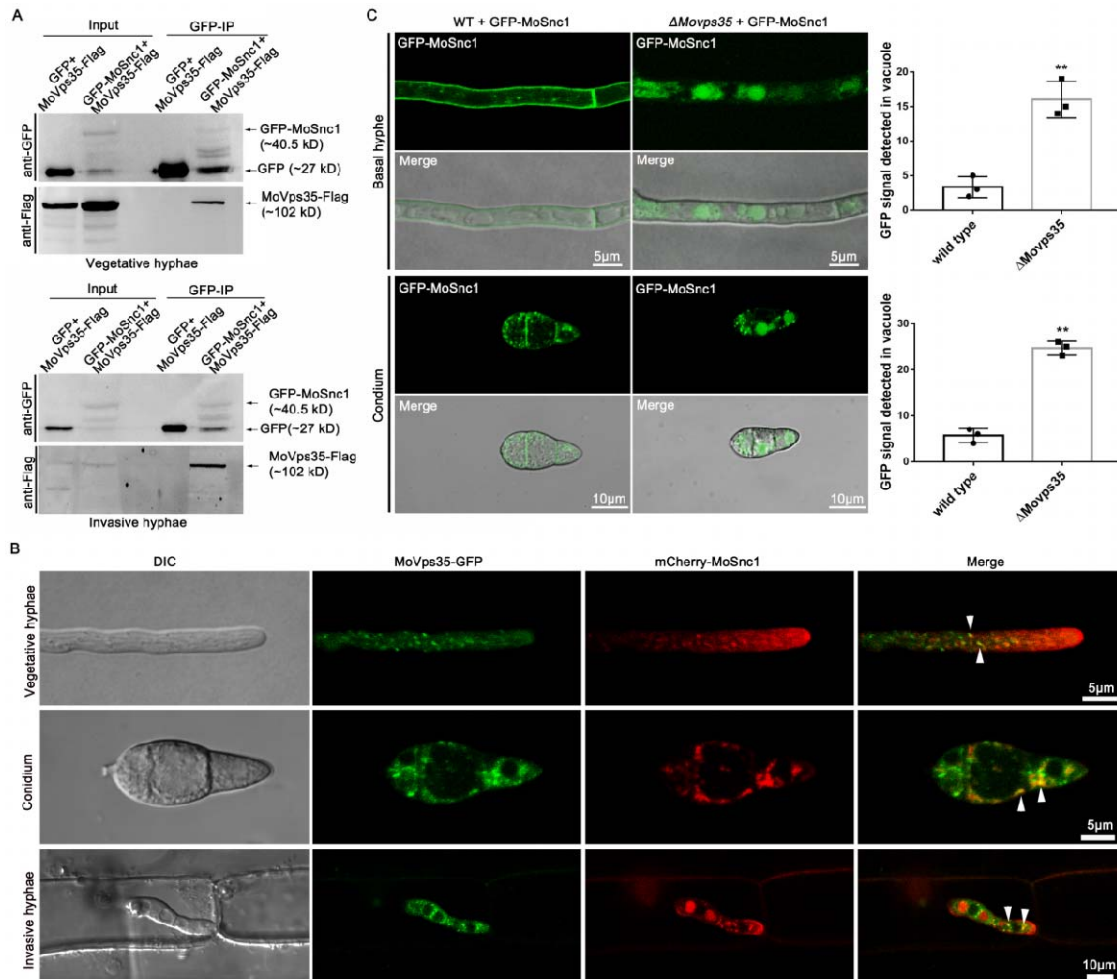

**Figure 7. MoVps35 interacts with the v-SNARE MoSnc1 and the association is required for MoSnc1 recycling to the plasma membrane.** (A) GFP-trap-based pull-down experiment indicating interaction between MoVps35 and MoSnc1 during *M. oryzae* vegetative and *in planta* growths. The strains co-expressing the indicated proteins were immunoprecipitated with GFP-trap beads. The IP signal (GFP-MoSnc1) and the Co-IP signal (MoVps35-Flag) were detected by immunoblotting with GFP and Flag antibodies, respectively. (B) Representative confocal micrographs showing partial co-localization (in yellow; Arrowheads) between MoVps35-GFP and mCherry-MoSnc1 in vegetative hyphae, conidia and invasive hyphae. (C) Deletion of

*MoVPS35* perturbs *MoSnc1* transport to the plasma membrane by mis-sorting *MoSnc1* towards the degradation compartments. In the WT hyphae or conidia, GFP-*MoSnc1* was detected on the plasma membrane. In contrast, GFP-*MoSnc1* was missorted into the vacuoles in the  $\Delta$ *Movps35* mutant. The bar charts show the frequency of GFP-*MoSnc1* in the vacuoles of hyphae and conidia in the wild type or the  $\Delta$ *Movps35* mutant. (\*\* $P < 0.01$ ; Student's *t* test; three biological replicates;  $n=30$ ).

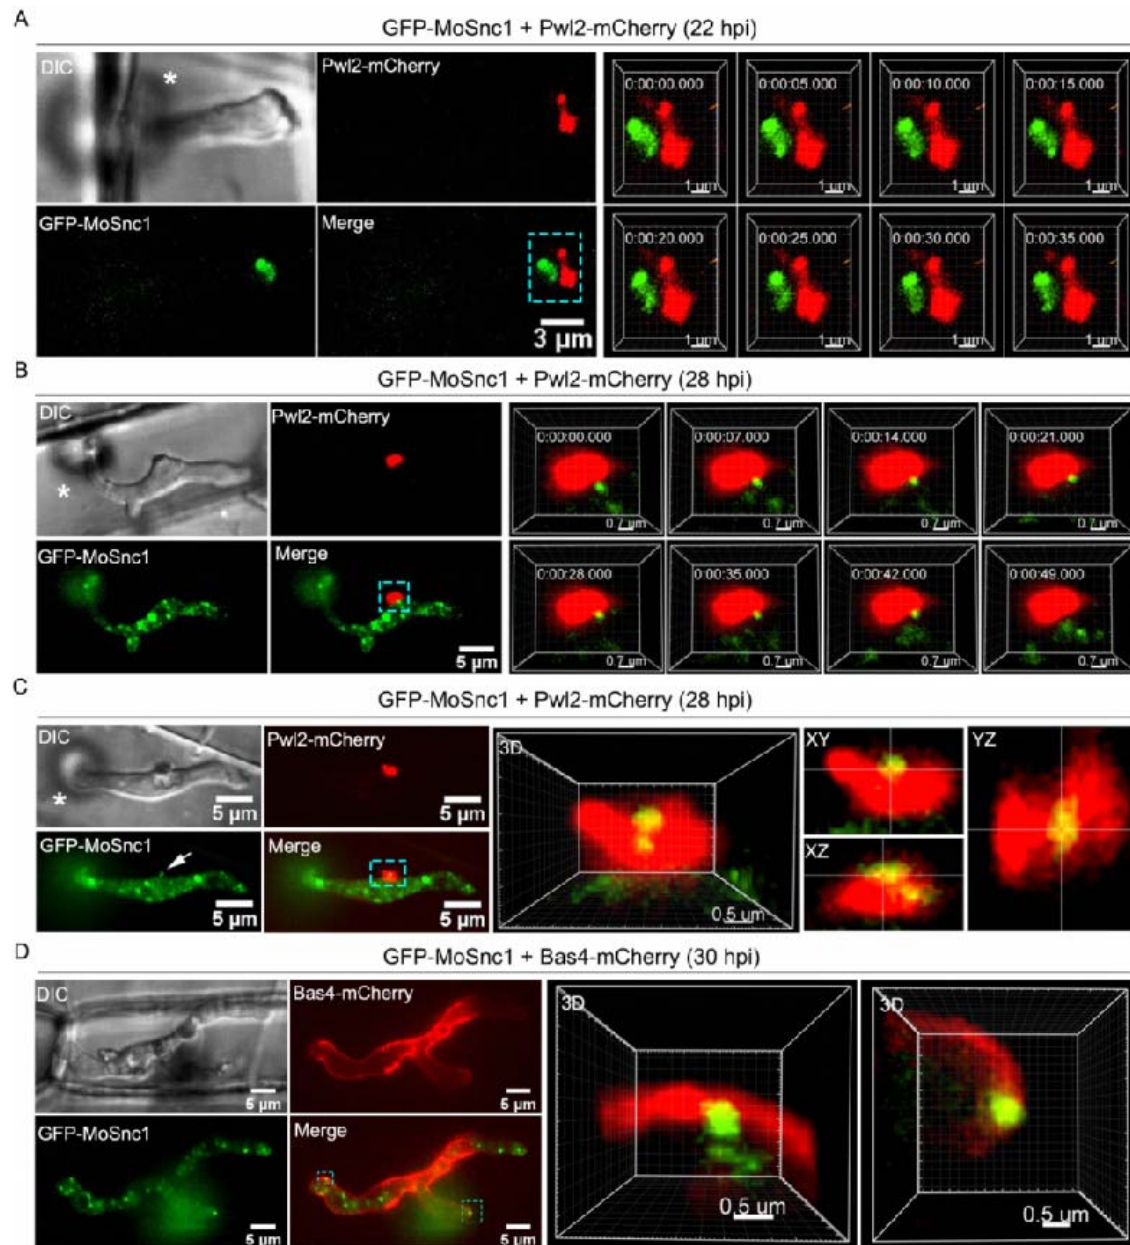

**Figure 8. The v-SNARE MoSnc1 associates with the BIC and EIHM during host invasion.** (A) Confocal micrographs of the primary invasive hyphae (22 hpi) expressing GFP-MoSnc1 and Pwl2-mCherry. At the hyphal tip, the concentrated GFP-MoSnc1 fluorescence is clearly adjacent to the tip-localized Pwl2-mCherry. The right panel shows a 3D reconstruction of the optical sections showing close association of the GFP-Snc1 and the tip BIC (Supplementary video 17). (B) Confocal image showing an intimate association between GFP-MoSnc1 and the BIC in bulbous hyphae *in planta* (28 hpi). Right panel, a GFP-MoSnc1-labelled vesicle in the IH is trafficked to the BIC and later fades away (Supplementary video 18). (C) A confocal image showing the delivery of GFP-MoSnc1 vesicles to the BIC. Notably, two GFP-MoSnc1-labelled small vesicles with diameters  $\leq 0.5 \mu\text{m}$  (arrow) are trafficked out of the invasive hypha and delivered into the BIC (see the zoom in view or the 3D Supplementary video 19). The orthogonal views XY, XZ and YZ clearly illustrate co-localization of GFP-MoSnc1 and Pwl2-mCherry. Co-localization is visible as yellow fluorescence. (D) Visualization of bulbous IH (30 hpi) expressing GFP-MoSnc1 and Bas4-mCherry (Apoplast/EIHM-specific marker). Some of GFP-MoSnc1-labelled puncta are clearly adjacent to the EIHM (see boxed region). The 3D rendering (right panel) shows an intimate positioning of the GFP-MoSnc1 and the EIHM (Bas4-mCherry) (Supplementary video 20-21). Asterisks indicate appressoria.



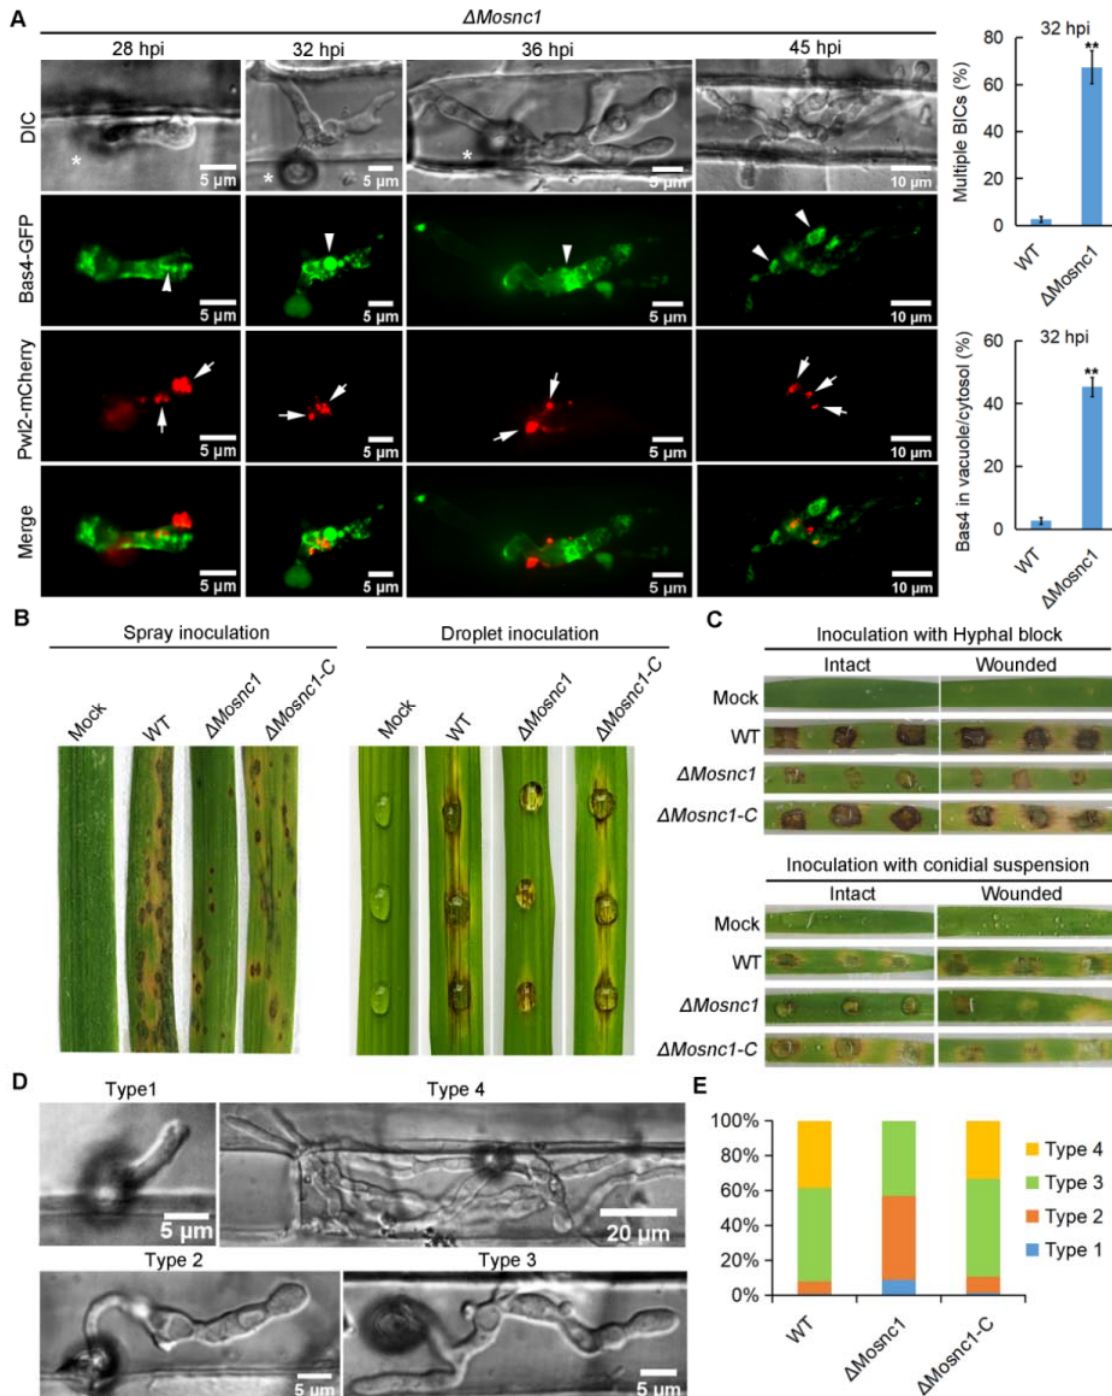

**Figure 9. The v-SNARE protein MoSnc1 mediates proper effector secretion and fungal pathogenicity in the rice blast fungus.** (A) The apoplastic effector Bas4-GFP and the cytoplasmic effector Pwl2-mCherry expressed in the  $\Delta$ Mosnc1 mutant are inappropriately secreted and mislocalized at all penetration stages. In the WT, Bas4-GFP shows apoplastic localization, outlining the IH, while it often accumulates inside the vacuole of the IH (arrowhead) where it loses its outlining appearance in



the  $\Delta Mosnc1$  mutant. Deletion of *MoSNC1* also causes Pwl2-mCherry fluorescence to appear as multiple and discrete fluorescent foci (arrows) in the IH of the mutant instead of one concentrated fluorescence at the specialized BIC region evident in the wild type. The bar charts show the percentages of IH containing multiple BICs and IH containing Bas4-mCherry in vacuole/cytosol in the WT and  $\Delta Mosnc1$  mutant. (\*\*P < 0.01; Student's *t* test; three biological replicates; 150 infected cells observed). (B) Targeted deletion of the *MoSNC1* gene resulted in a significant reduction of *M. oryzae* pathogenicity to rice seedlings. The rice leaves (*Oryza sativa* cv. CO39) were sprayed with conidia from the wild-type strain,  $\Delta Mosnc1$  mutant and the complemented  $\Delta Mosnc1$  strain. (C) Similarly, pathogenicity defects were observed after inoculation of  $\Delta Mosnc1$  mutants on barley leaves. The barley leaves (intact and wounded) were inoculated with mycelial plugs (top panel) and conidia suspension (bottom panel). (D and E) Penetration assays in rice leaf sheath. IH growth in rice cells was observed at 38 hpi, and 4 types of IH were quantified and statistically analyzed (type 1: filamentous primary IH; type 2: a single bulbous IH; type 3: branched bulbous IH but limited to one cell; type 4: IH spread to adjacent cells). Error bars represent standard deviations. A total of 50 invaded cells were analyzed, and the experiment was repeated thrice.

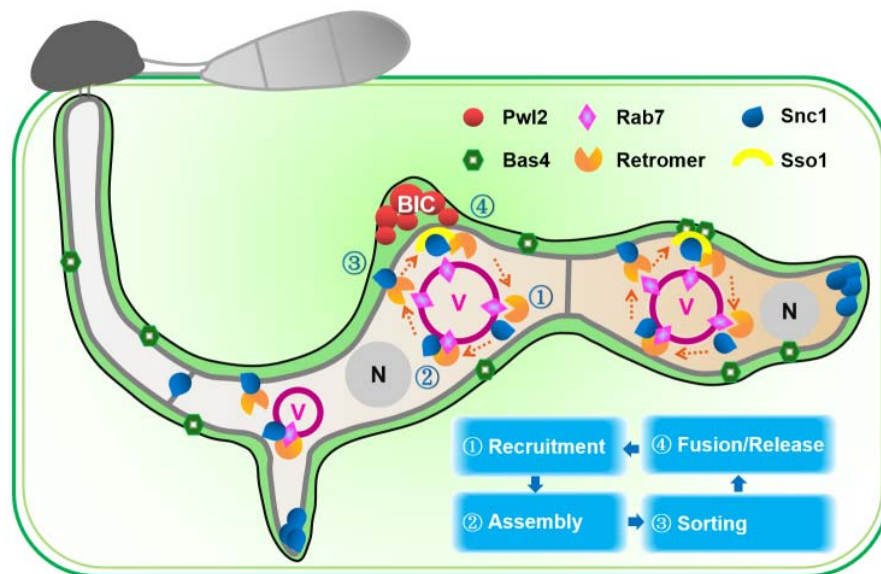

**Figure 10.** A proposed model depicting the effector secretion in MoRab7/Retromer/MoSnc1-based endolysosomal cascade. During *M. oryzae*

biotrophic invasion, cytoplasmic effectors (eg. Plw2) preferentially accumulate in the biotrophic interfacial complex (BIC), while it is often associated with a large vacuole (purple) in bulbous invasive hyphae, compared to nucleus (N). MoRab7 uniformly localizes to vacuolar membrane and recruits retromer complex for vesicular trafficking. A conserved v-SNARE protein, MoSnc1, is recognized by retromer complex and subjected to recycling from vacuole to BIC associated membrane and fungal plasma membrane, mediating fusion of secretory vesicles with this target membrane. The correct/efficient secretion of cytoplasmic and apoplastic effectors (eg. Bas4) require MoRab7/Retromer/MoSnc1-based endolysosomal cascade.

Table 1. Putative SNARE interactors for MoVps35–GFP

| Accession                 | Coverage of peptides | Repeatable |
|---------------------------|----------------------|------------|
| <b>MGG_12614 (MoSnc1)</b> | ****                 | Yes        |
| MGG_00978 (MoSso2)        | **                   | Yes        |
| MGG_03885 (MoPep12)       | **                   | Yes        |
| MGG_01124 (MoVit1)        | ***                  | Yes        |
| MGG_06521 (MoSyn8)        | **                   | Yes        |
| MGG_06125 (MoYkt6)        | ***                  | Yes        |
| MGG_01681 (MoNyv1)        | **                   | Yes        |
| MGG_06883 (MoTlg2)        | ***                  | Yes        |
| MGG_08082 (MoTlg1)        | ***                  | Yes        |
| MGG_07189 (MoBet1)        | **                   |            |
| MGG_04454 (MoGos1)        | **                   |            |
| MGG_12919 (MoUse1)        | *                    |            |

Coverage of peptides: \*, 1~5%, \*\*, 5~15%, \*\*\*, 15~30%, \*\*\*\*, >30%.

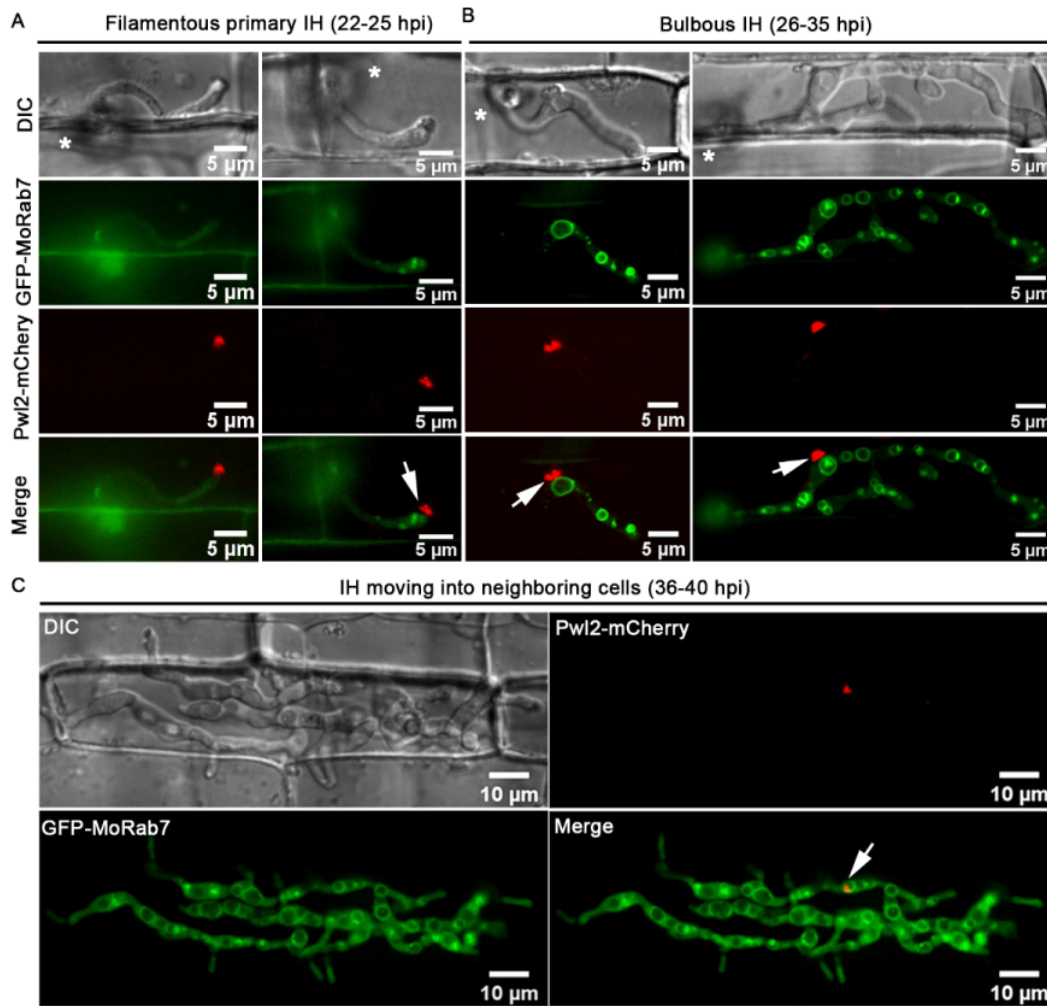

**Figure S1. Close association of MoRab7 and BIC during host invasion in the blast fungus.** (A) Localization of GFP-MoRab7 and PwI2-mCherry at the early infection stage (22-25 hpi). At the initial penetration stage, PwI2-mCherry is positioned at the tip of the primary filamentous invasive hyphae (IH) while GFP-MoRab7 signal is quite weak. Once the tip of the primary hypha begins to swell, the GFP-MoRab7 signal intensifies and enhances, and gradually emerges. (B) At the mid infection stage (26-35 hpi), the GFP-MoRab7 positive ring structure is adjacent to the BIC (arrow) in the bulbous hyphae. (C) At the later infection stage (36-40 hpi), GFP-MoRab7 ring structure associates with the BIC (arrow) as the IH grow into the neighboring cells. Asterisks indicate appressoria.

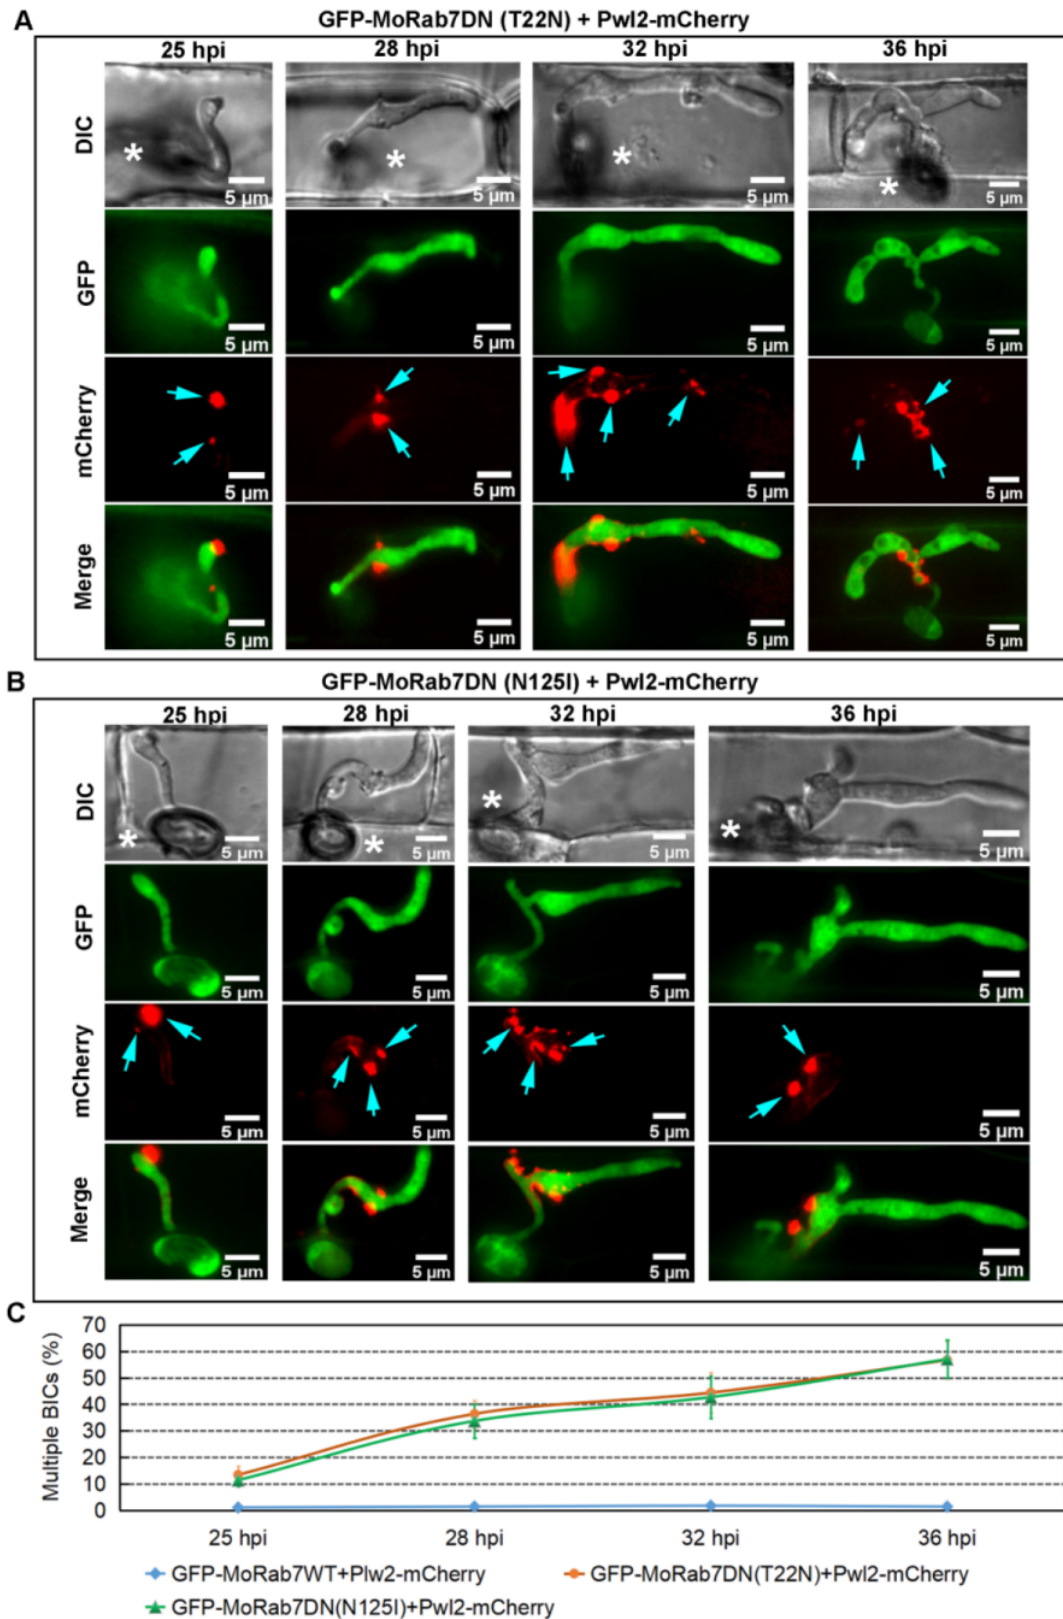

**Figure S2. Inactivation of MoRab7 impairs Pwl2 localization.** (A) The dominant-negative GFP-MoRab7<sup>T22N</sup> mutation (locked in GDP-bound state) using *PWL2*

promoter failed to target the MoRab7 protein to the vacuolar membrane; it rather caused inappropriate secretion of the protein. Multiple and discrete fluorescent foci (arrows) are observed in the IH, especially in the bulbous IH. (B) Another dominant-negative site (N125I) of MoRab7 was selected and overexpressed using PWL2 promoter. The result shows that GFP-MoRab7DN(N125I) are present at the cytosol and cause improper secretion of Pwl2-mCherry protein in the bulbous IH. Asterisks indicate appressoria. (C) A line graph showing the percentage of multiple BICs of the IH in the indicated strains at each time point. Error bars represent standard deviations; three biological replicates; 300 infected cells observed.



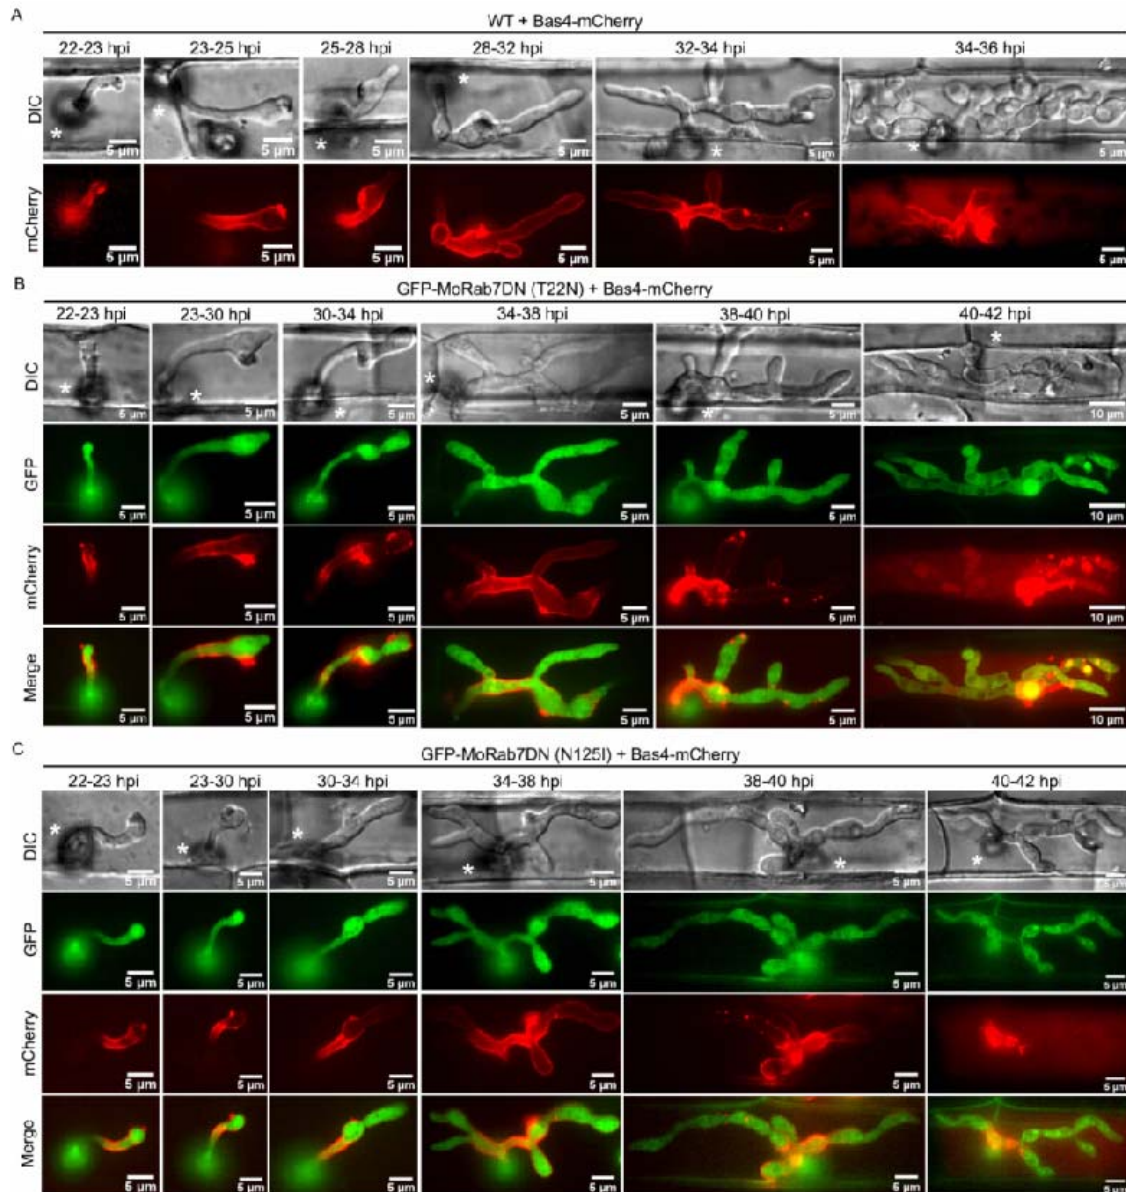

**Figure S3. Inhibition of MoRab7 GTPase activity does not affect the localization of the apoplastic effector Bas4 during invasive growth in rice sheath.** (A) The Bas4-mCherry fusion protein was expressed under its native promoter in the wild type (WT) and initially outlines the invasive hyphae during invasion of the initial epidermal cells (22-32 hpi). After 32 h, Bas4-mCherry signals appear patchy or diffused inside the infected rice cells, suggesting that EIHM lost its integrity. (B and C) Overexpression of dominant-negative GFP-MoRab7 via T22N or N125I (locked in GDP-bound state) mutation using PWL2 promoter resulted in failure of the protein to target vacuolar membrane and in delay of IH development, but does



not affect the normal secretion of Bas4-mCherry protein. Asterisks indicate appressoria.

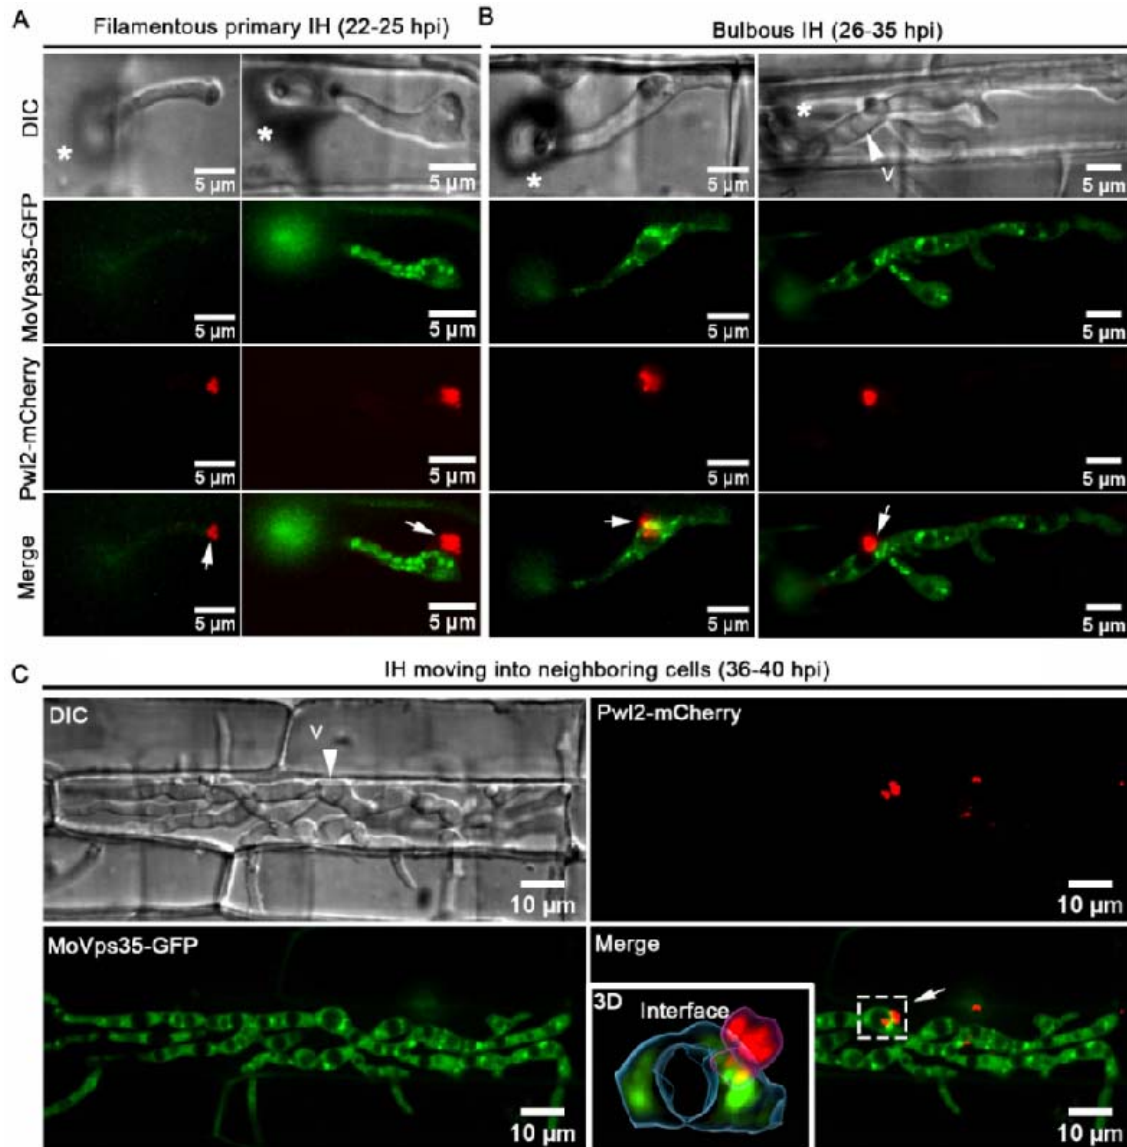

**Figure S4. MoVps35 shows punctate epifluorescence in close proximity to the BIC.** (A) At the initial penetration stage (22-25 hpi), Pwl2-mCherry is concentrated at the tip BIC preceding the MoVps35 expression in filamentous invasive hyphae. As the primary filamentous IH begin to swell, the MoVps35-GFP showed distinct fluorescence and some of which are near to the BIC. (B) At the mid penetration time points (26-35 hpi), filamentous primary IH have developed into bulbous IH and MoVps35 localizes to the vacuolar membrane next to the BIC. (C) At the later

infection stage (36-40 hpi), MoVps35 is adjacent to the vacuolar membrane and also associates with the BIC (arrow) as the IH grow into neighboring cells. The 3D image shows an intimate interfacial positioning of the vesicular sorting machinery (green vesicles, MoVps35-GFP) and the BIC (red vesicles, PwI2-mCherry). V indicates vacuole (vacuoles appear hollow in DIC images). Asterisks indicate appressoria while the white arrows point to the BIC.

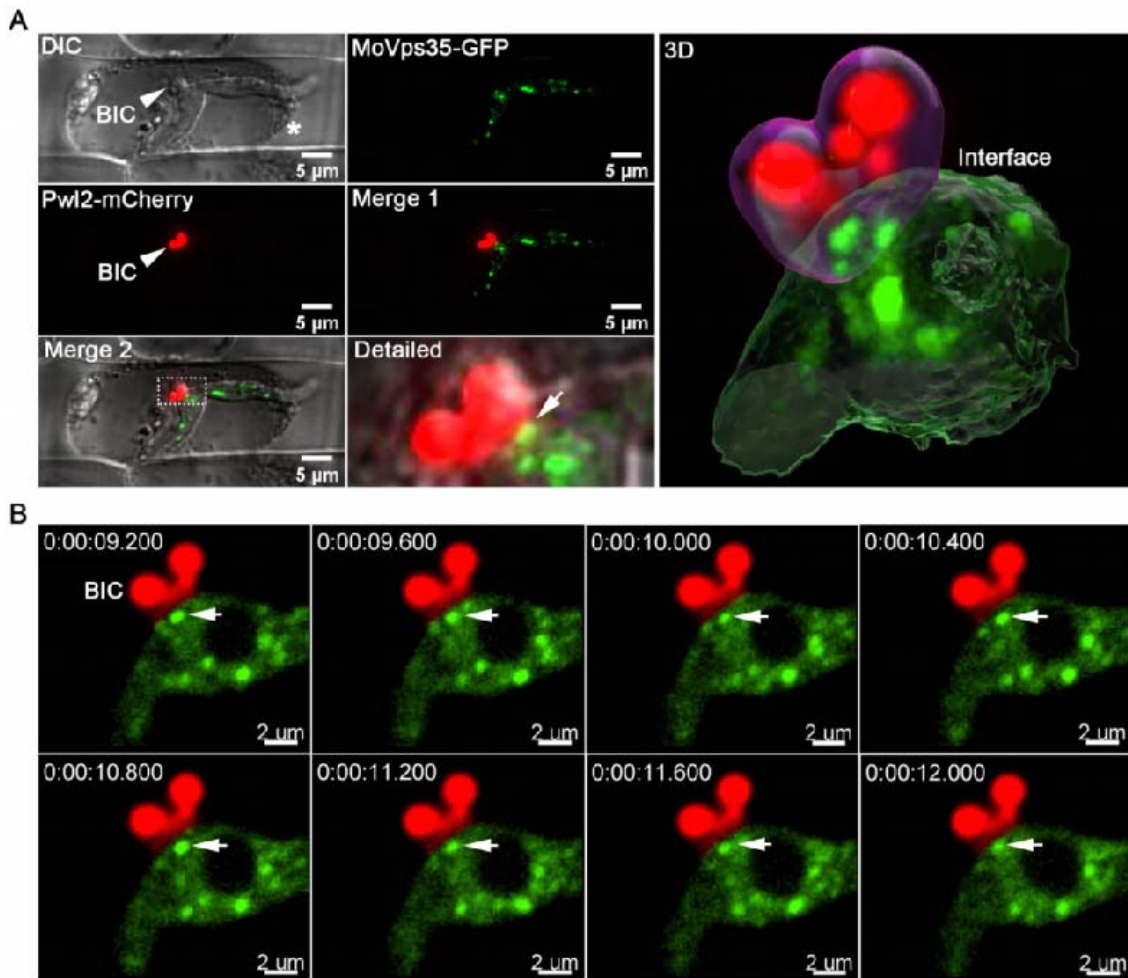

**Figure S5. MoVps35-GFP-labeled vesicles localize proximal to the BIC upon sucrose-induced plasmolysis.** (A) Visualization of bulbous IH expressing MoVps35-GFP and PwI2-mCherry in the plasmolyzed rice cell. The surface rendered 3D image (panel on the right) shows the close positioning of the vesicular sorting machinery (green vesicles, MoVps35-GFP) and the BIC (PwI2-mCherry). (B) Dynamic tracking of MoVps35-GFP labeled vesicles near the BIC during host

invasion (Supplementary video 13). Images were captured at 400-ms intervals. Asterisk indicates shrunken protoplast from the rice cell; arrowheads point to the BIC; and full arrows to the MoVps35-GFP labeled vesicles.

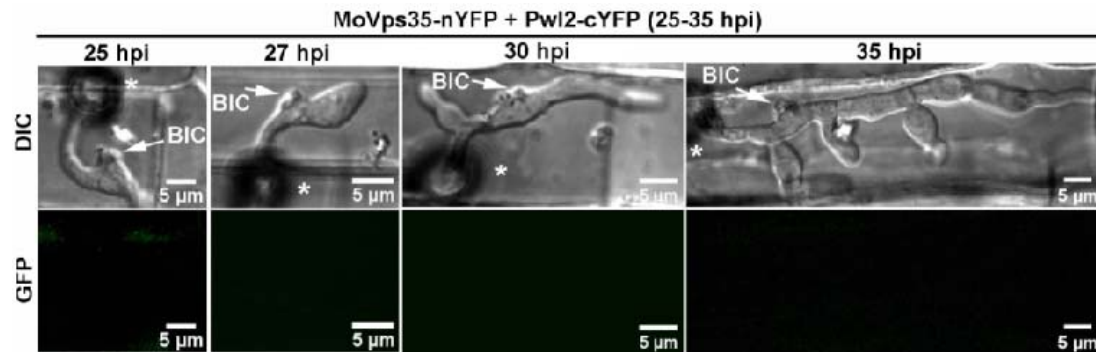

**Figure S6. Bimolecular fluorescence complementation (BiFC) assay to test the interaction between MoVps35 and Pwl2 *in vivo*.** No obvious fluorescent signal was observed in the IH co-expressing MoVps35-nYFP and Pwl2-cYFP during *M. oryzae* infection (26-35 hpi). Arrows point to the BIC; asterisks indicate appressoria. DIC: Differential Interference Contrast images.

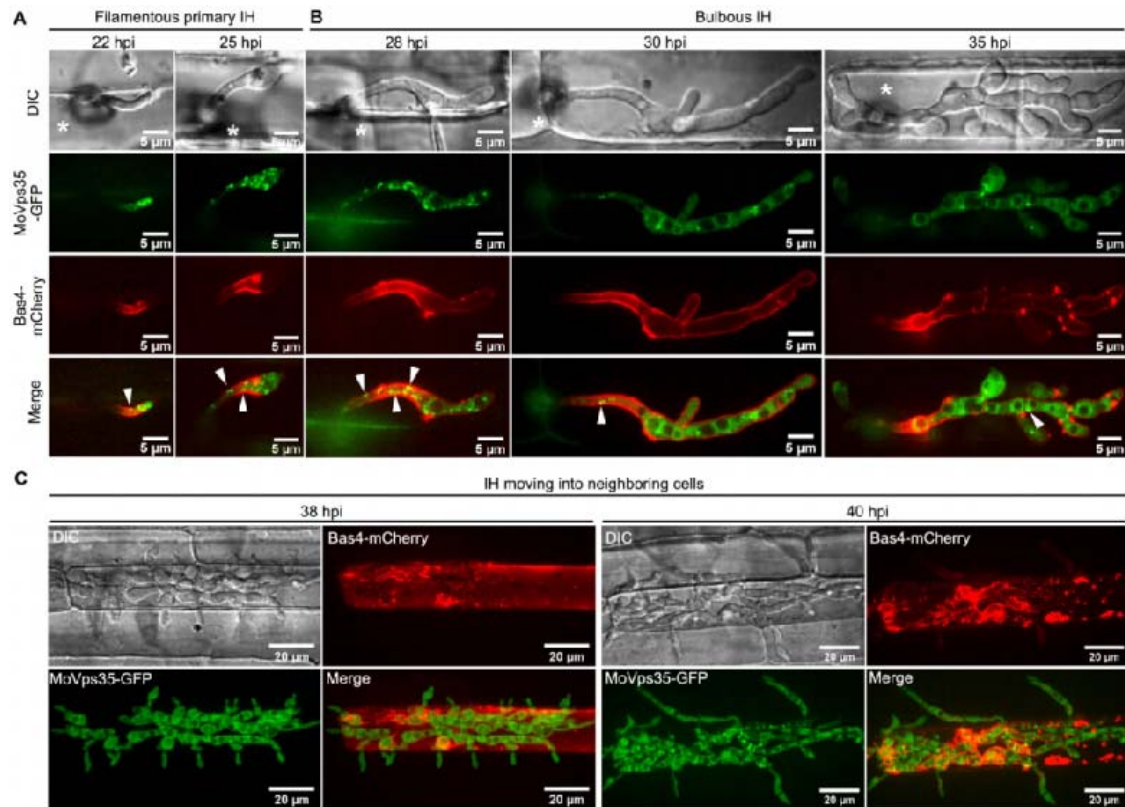

**Figure S7. Visualization of the infectious hyphae co-expressing MoVps35-GFP and Bas4-mCherry (EIHM-specific marker) during *M. oryzae* infection.** (A and B) Some of MoVps35-GFP-labeled dots are adjacent to the EIHM (arrowheads) during invasion of the initial rice sheath cells (22-35 hpi). (C) At later time points (>38 hpi), the IH entered the neighboring cells, and Bas4-mCherry is evident in the plant cytoplasm but does not diffuse into the adjacent rice cells after the EIHM collapses. Asterisks indicate appressoria.

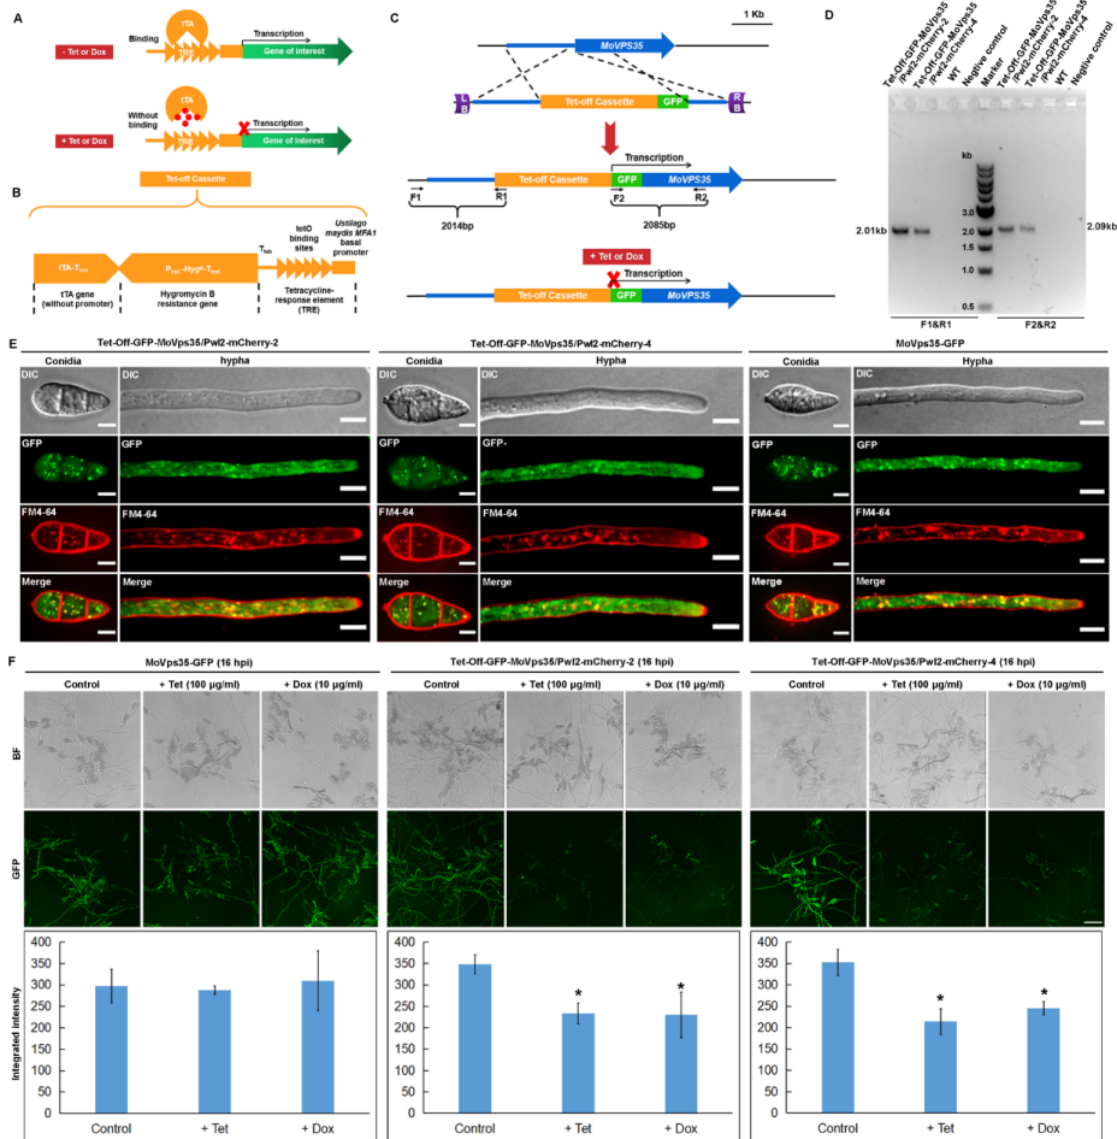

**Figure S8. Generation and verification of Tet-off-GFP-MoVps35/Pwl2-mCherry strains.** (A) Schematic representation of the gene regulon of the Tet-off system. In the absence of Tet (tetracycline) or Dox (doxycycline), tTA (tetracycline-dependent transactivator) binds the TRE (Tet-response element) and activates gene transcription. (B) Schematic representation of Tet-Off cassette consisting of the tetracycline-dependent transactivator-encoding gene tTA (without promoter) and the tetracycline-responsive element TRE separated by the Hygromycin B-resistance locus. (C) Schematic representation of MoVps35-locus integration via homologous recombination. Primers F1, R1, F2 and R2 were used to screen and identify the correct transformants. (D) PCR-based verification of the Tet-off-GFP-MoVps35/Pwl2-mCherry strains. DNA bands of 2.01-kb and 2.09-kb were observed in the two



independent Tet-off-GFP-MoVps35/Pwl2-mCherry strains, respectively, while no bands were observed in the wild-type (WT) strain or the negative control. (E) Analysis of the localization of MoVps35 from two independent Tet-off-GFP-MoVps35/Pwl2-mCherry strains. GFP-MoVps35 localizes to punctate structures that partially co-localized with FM4-64 that marks the endosomal membranes in conidia and hyphae, which is consistent with the localization of MoVps35-GFP in the complemented strain. (F) Tetracycline- or doxycycline-regulated *MoVPS35* expression. Treatment of Tet-off-GFP-MoVps35/Pwl2-mCherry strain with either tetracycline or doxycycline (100 or 10 µg/ml, respectively) significantly reduced the GFP-MoVps35 expression to basal levels. In the control strain MoVps35-GFP, neither the presence of tetracycline nor that of doxycycline influenced the GFP intensity.



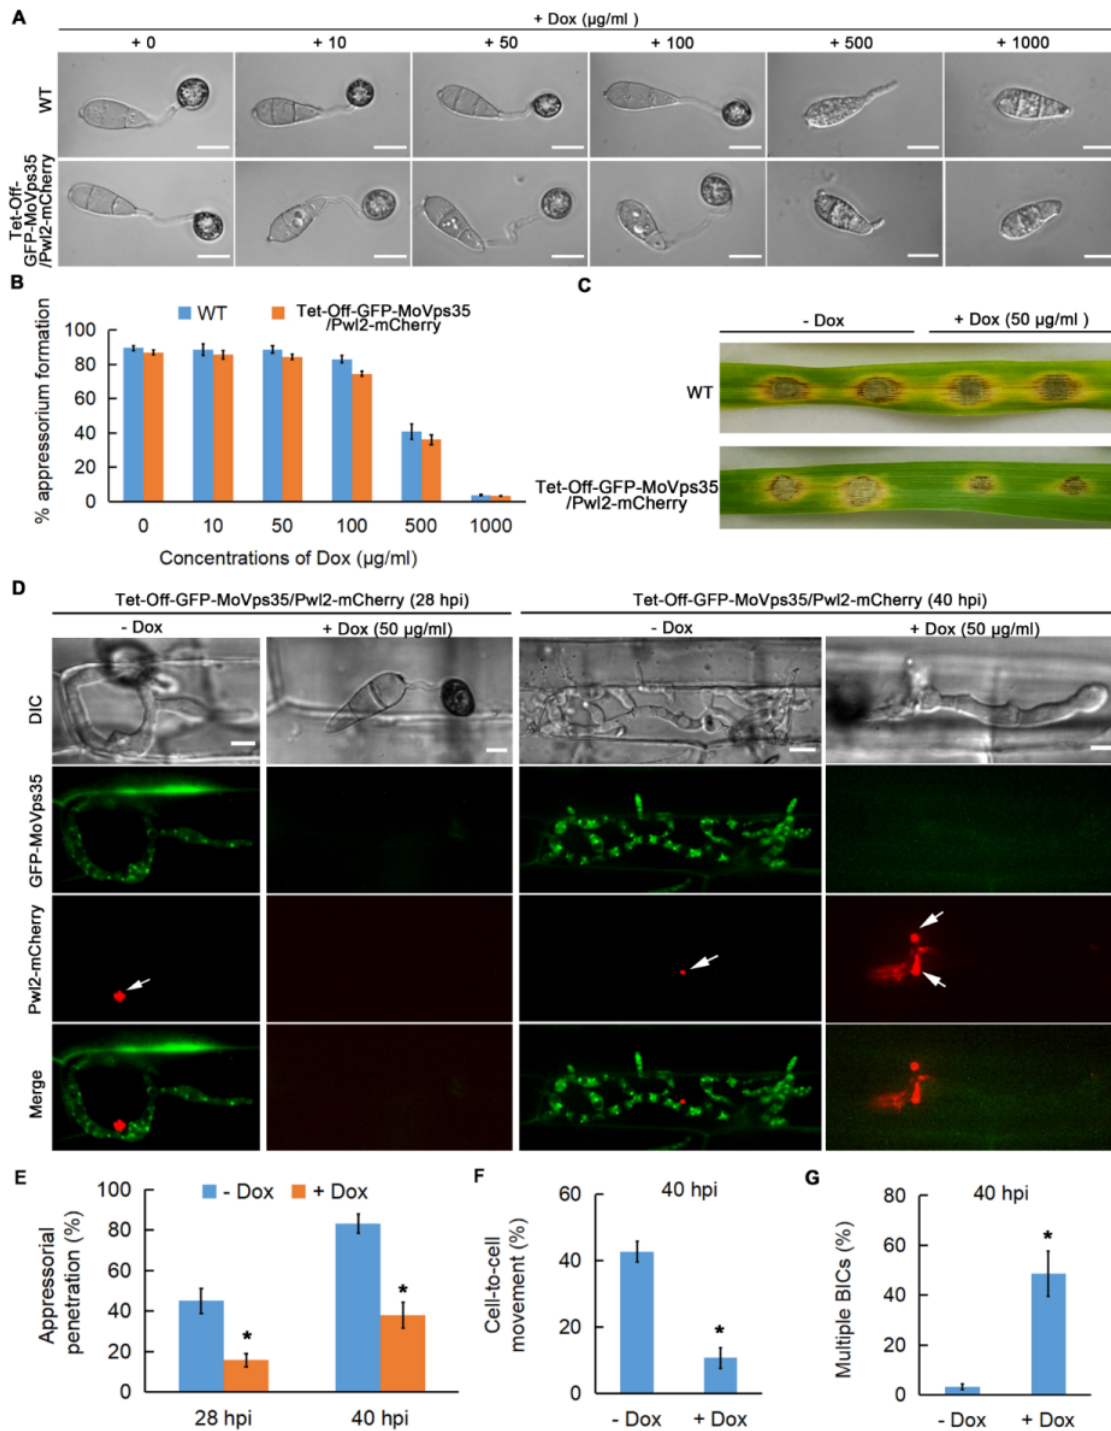

**Figure S9. Retromer-dependent regulation of plant infection and PwI2 effector secretion by *M. oryzae*.** (A and B) Addition of Dox (doxycycline;  $<100 \mu\text{g/ml}$ ) does not affect appressorium development (Student's *t* test; three biological replicates; 600 spores observed). (C) Leaf drop inoculation assay showing the effect of Dox (50  $\mu\text{g/ml}$ ) on lesion formation by the Tet-off-GFP-MoVps35/PwI2-mCherry strain. The

presence of Dox has no significant effect on the wild type. (D) Chemico-genetic inactivation of MoVps35 impairs plant infection and Pwl2 effector secretion in *M. oryzae*. Representative laser confocal micrographs showing strong GFP-MoVps35 expression at 28 and 40 hpi in IH during infection. The GFP-MoVps35 expression ceased after treatment with 50 µg/ml Dox. Consistently, addition of Dox to the conidia of Tet-off-GFP-MoVps35/Pwl2-mCherry strain results in a significant decrease in appressorium-mediated host penetration (28 hpi) and increased the overall number of BICs in the invasive hypha (40 hpi). BICs are indicated by arrows. (E) A bar chart showing the frequency of plant penetration at 28 and 40 hpi by *M. oryzae* conidia in the presence or absence of 50 µg/ml Dox (\*P < 0.05; Student's *t* test; three biological replicates; 300 appressorium observed). (F) Bar chart depicting the frequency of cell-to-cell movement at 40 hpi by *M. oryzae* in the presence or absence of 50 µg/ml Dox (\*P < 0.05; Student's *t* test; three biological replicates; 150 infected cells observed). (G) A bar chart showing the frequency of multiple BICs at 40 hpi in *M. oryzae* in the presence or absence of 50 µg/ml Dox (\*P < 0.05; Student's *t* test; three biological replicates; 150 infected cells observed).

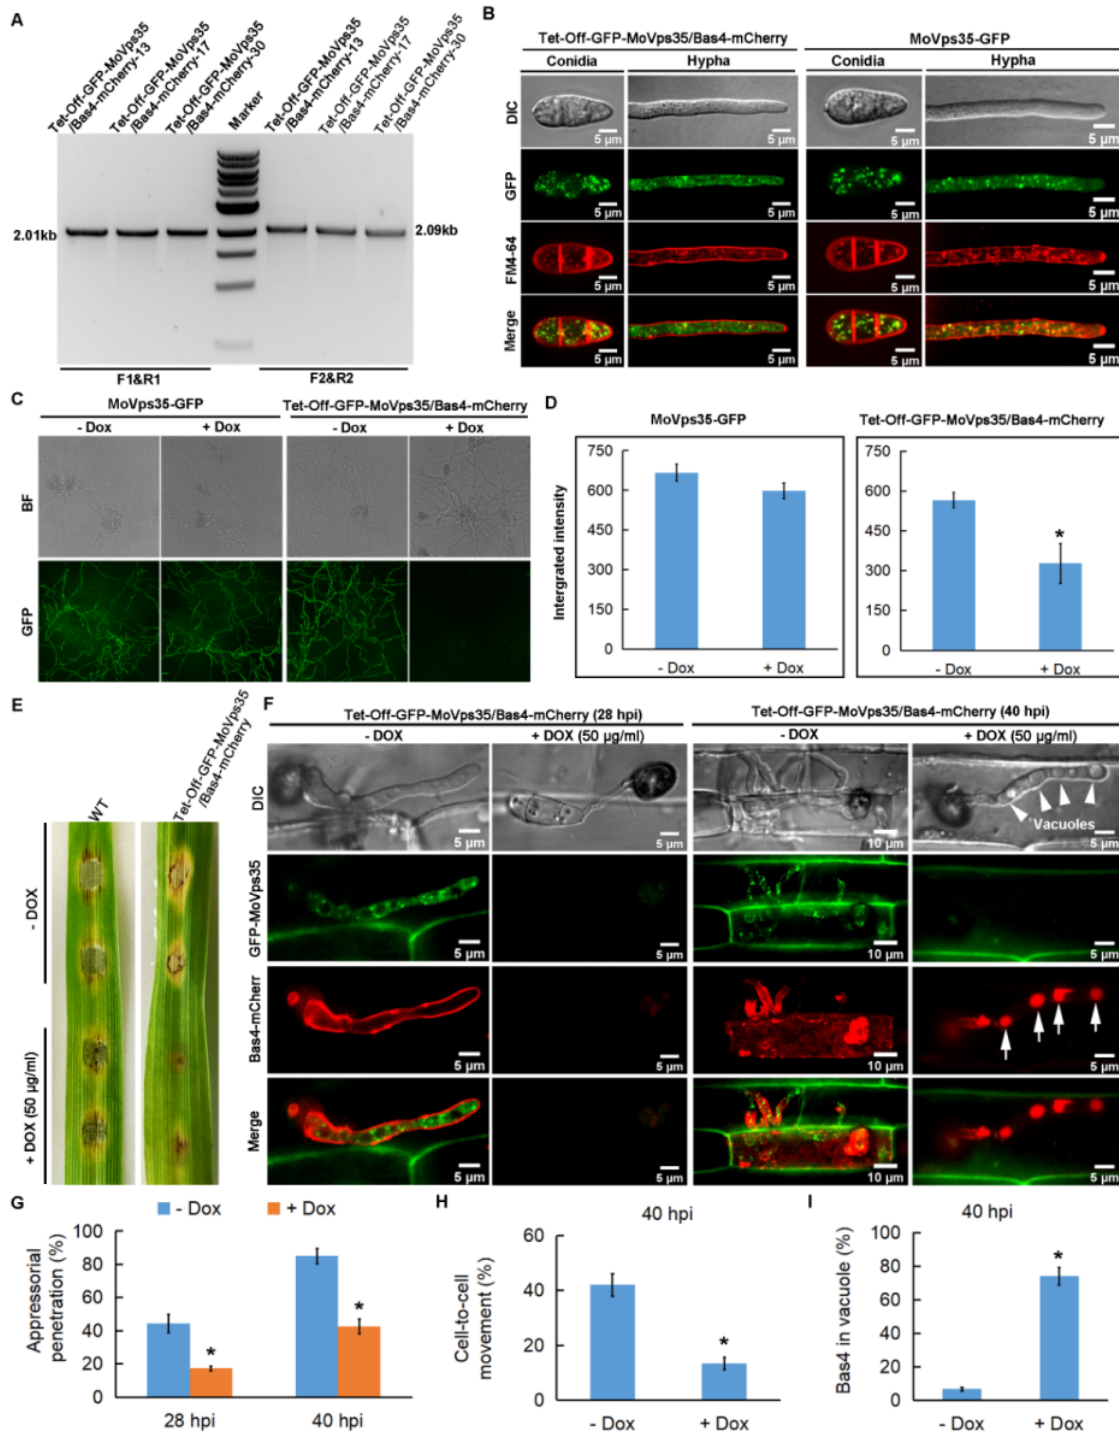

**Figure S10. Generation of Tet-off-GFP-MoVps35/Bas4-mCherry strain and testing its role in plant infection and Bas4 secretion.** (A) PCR verification of the Tet-off-GFP-MoVps35/Bas4-mCherry positive transformants. DNA bands of 2.01-kb and 2.09-kb were observed in the three independent Tet-off-GFP-MoVps35/Bas4-mCherry strains, respectively. (B) Analysis of the localization of MoVps35 in Tet-off-

GFP-MoVps35/Bas4-mCherry strain. The GFP-MoVps35 punctae partially colocalize with FM4-64 that marks the endosomal membranes in conidia and hyphae, consistent with the localization of MoVps35-GFP in the complemented strain. (C) Doxycycline-regulated MoVps35 expression. Treatment of Tet-off-GFP-MoVps35/Bas4-mCherry strain with doxycycline (10 µg/ml) reduced the GFP expression to basal levels. In the control MoVps35-GFP strain, treatment with doxycycline did not influence the GFP intensity. (D) Quantification of GFP intensity. (E) Leaf drop inoculation assay showing the effect of Dox (50 µg/ml) addition on lesion formation by the Tet-off-GFP-MoVps35/Bas4-mCherry strain. The presence of Dox has no significant effect on the WT. (F) Chemical genetic inactivation of MoVps35 impairs plant infection and Bas4 effector secretion by *M. oryzae*. Representative laser confocal micrographs showing strong GFP-MoVps35 expression at 28 and 40 hpi in IH undergoing infection. The GFP-MoVps35 expression ceased after treatment with 50 µg/ml Dox. Consistently, addition of Dox to the conidia of Tet-off-GFP-MoVps35/Bas4-mCherry resulted in a significant decrease in appressorium function of host penetration (28 hpi) and caused mislocalization of Bas4 into the vacuoles in *M. oryzae* (40 hpi). Arrowheads point to the vacuoles (vacuoles appear as hollows in DIC imaging). Mislocalized Bas4 effector is indicated by arrows. (G) A bar chart showing the frequency of plant penetration at 28 and 40 hpi by *M. oryzae* conidia in the presence or absence of 50 µg/ml Dox (\*P < 0.05; Student's *t* test; three biological replicates; 300 appressorium observed). (H) Bar chart showing the frequency of cell-to-cell movement at 40 hpi by *M. oryzae* in the presence or absence of 50 µg/ml Dox (\*P < 0.05; Student's *t* test; three biological replicates; 150 infected cells observed). (I) A bar chart showing the percentage of *M. oryzae* IH containing vacuolar Bas4-mCherry at 40 hpi in the presence or absence of 50 µg/ml Dox (\*P < 0.05; Student's *t* test; three biological replicates; 150 infected cells observed).

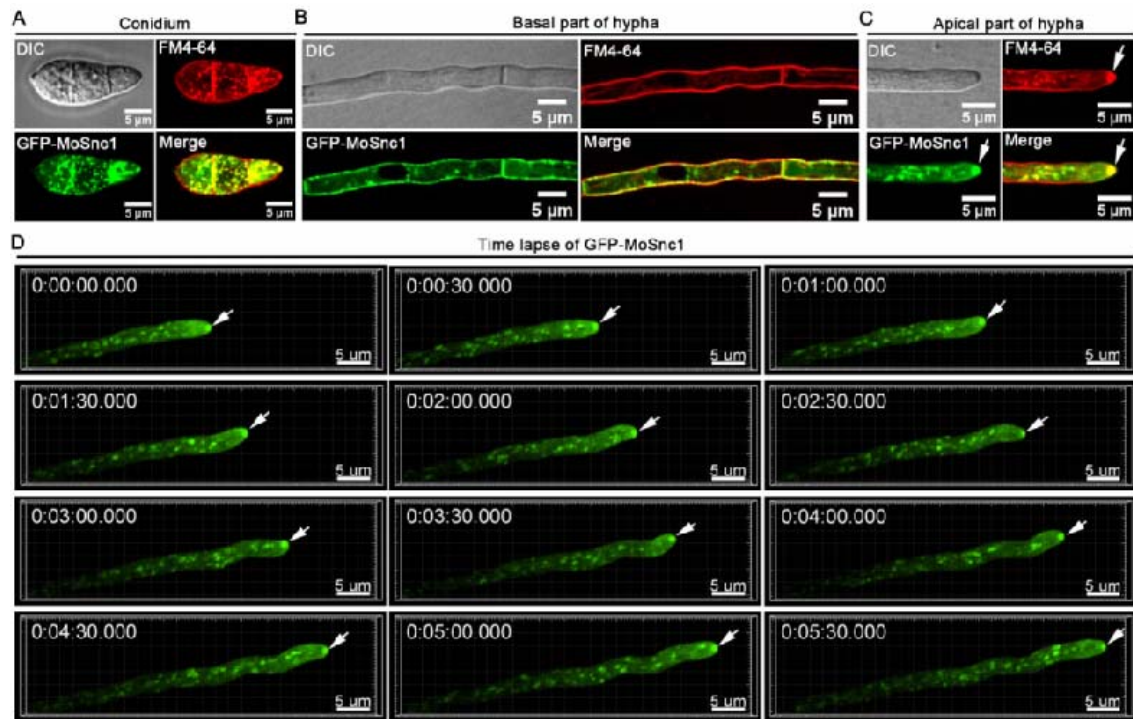

**Figure S11. GFP-MoSnc1 localizes to endosomes, plasma membrane and hyphal apex.** (A) GFP-MoSnc1 signal was found in multiple punctae inside a conidium and were partially co-localized with the endocytic and endosome marker dye FM4-64. (B) In basal part of hyphae, GFP-MoSnc1 is mainly localized to the plasma membrane and septa stained with FM4-64. (C) In the growing hypha, GFP-MoSnc1 signal also concentrated at the hyphal apex and is co-localized with the FM4-64 marked Spitzenkörper and/or polarisome (arrow). (D) Dynamic tracking of GFP-MoSnc1 in the vegetative hyphae growing on CM medium (Supplementary video 16). DIC: Differential Interference Contrast.



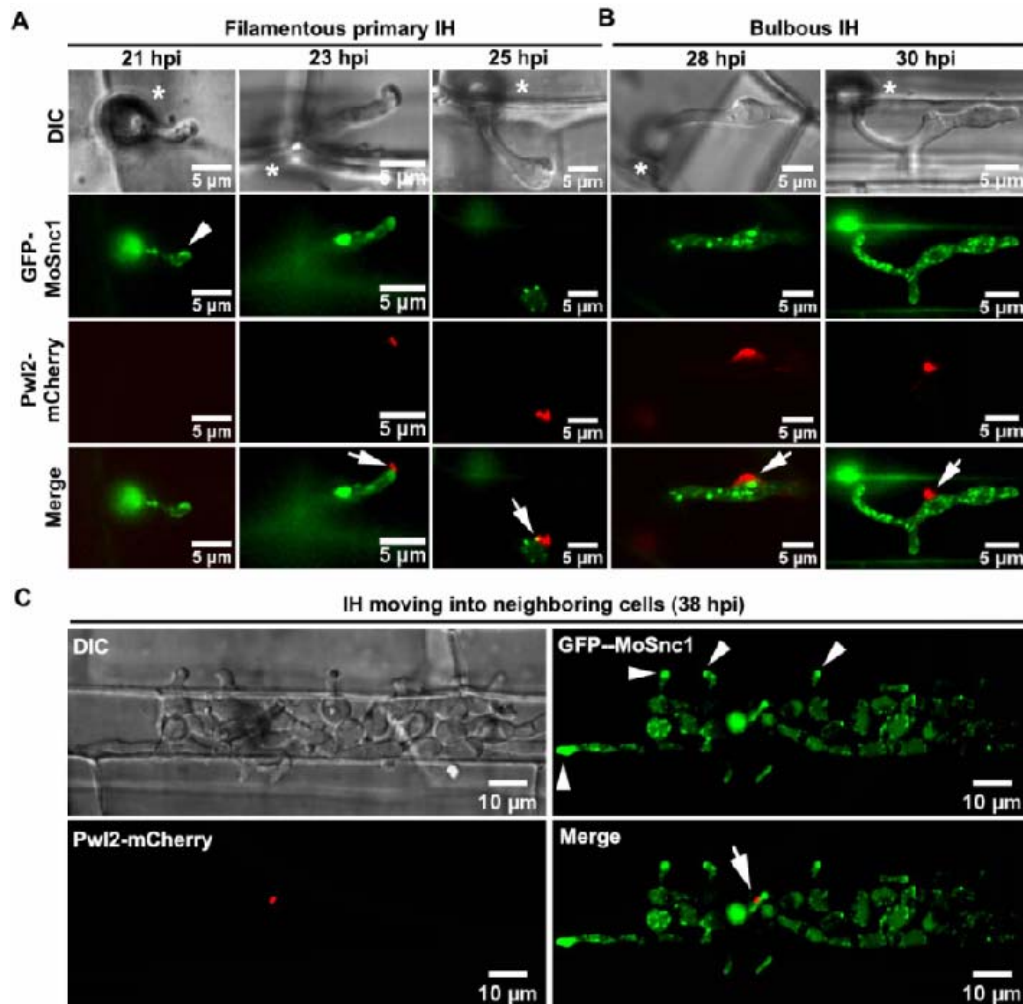

**Figure S12. MoSnc1 shows punctate fluorescence next to the BIC.** (A) At the initial penetration stage (21 hpi), GFP-MoSnc1 signal is evident at the tip (arrowhead) of the filamentous invasive hyphae while Pwl-mCherry is undetectable at this time point. When primary invasive hyphae begin to swell, the GFP-MoSnc1 fluorescence is still concentrated at the hyphal tip where the BIC (arrow) is eventually formed (23 hpi). As the hypha develops, the BIC is repositioned to the side of the first IH cell, while GFP-MoSnc1 still associates with the BIC (arrow) (25 hpi). (B) At 26-30 hpi, the filamentous primary IH develop into bulbous IH where some of the GFP-MoSnc1 vesicles are closely associated with the BIC (arrow). (C) At the later infection stage (38 hpi), GFP-MoSnc1 vesicles remain associate with the BIC. In addition, GFP-MoSnc1 is concentrated at the IH apex (arrowhead) as the hyphae grow into the neighboring cells. V indicates the vacuole. Asterisks indicate the appressoria. Arrows mark the BIC. Arrowheads indicate the IH apex/tip.



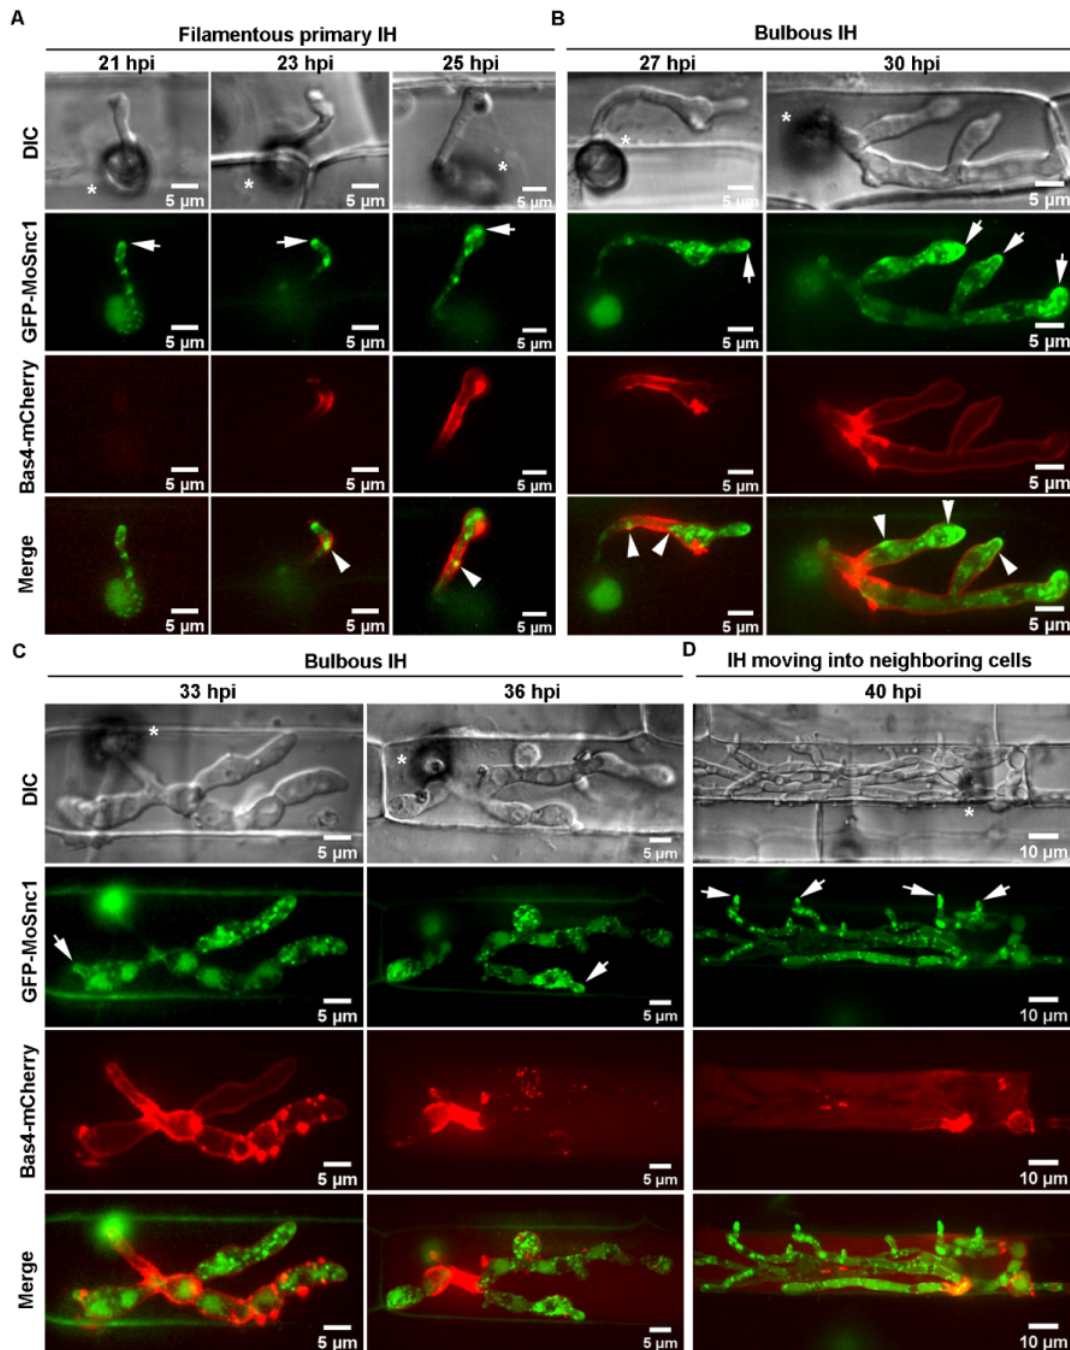

**Figure S13. Visualization of infectious hyphae expressing GFP-MoSnc1 and Bas4-mCherry during host infection by *M. oryzae*.** (A and B) Confocal micrographs showing some of the GFP-MoSnc1-labeled dots positioned adjacent to the EIHM (arrowheads) during invasion of the initial rice sheath cells (21-30 hpi). (C) Bas4-mCherry signals appear patchy at 33 hpi and further diffuse inside the infected rice cells at 36 hpi, suggesting loss of EIHM integrity. (D) At the later time point (40

hpi), when the IH spread to the neighboring cells, Bas4-mCherry fluorescence is observed in the host cytoplasm but does not diffuse into the adjacent rice cells after the EIHM collapses. Arrows indicate accumulation of GFP-MoSnc1 at the tip of the invasive hyphae. Asterisks indicate appressoria.

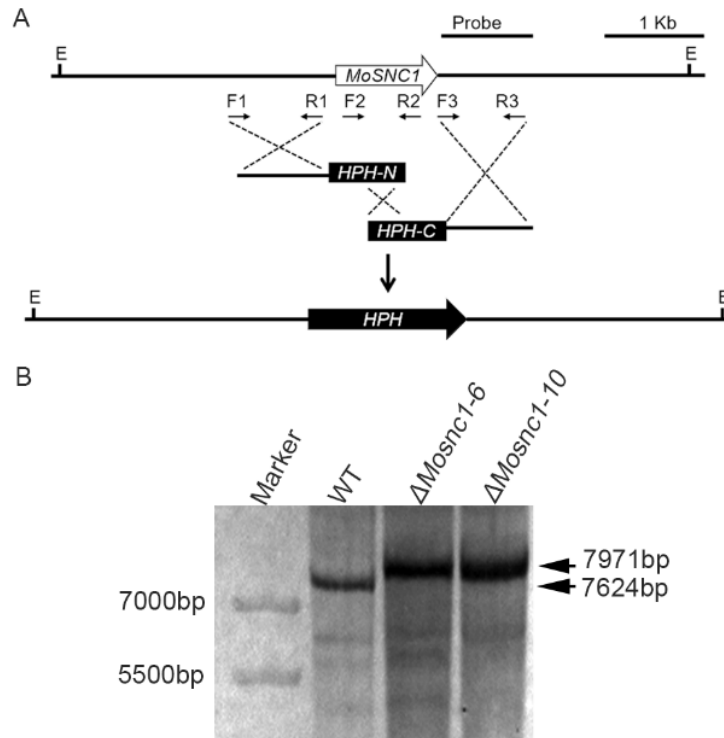

**Figure S14. Schematic diagram of the genomic regions of *MoSNC1* and the *HPH* (Hygromycin B phosphotransferase) locus.** Primers F1, R1, F3 and R3 were used to generate the *MoSNC1* gene replacement construct, and F2 and R2 were used for mutant screening and identification. E, *EcoRI*. (B) Southern blots of *EcoRI*-digested genomic DNA were probed with the 3'UTR fragment of *MoSNC1*. A 7624bp band was observed in the wild-type, while 7971bp band was observed in the two independent mutants.

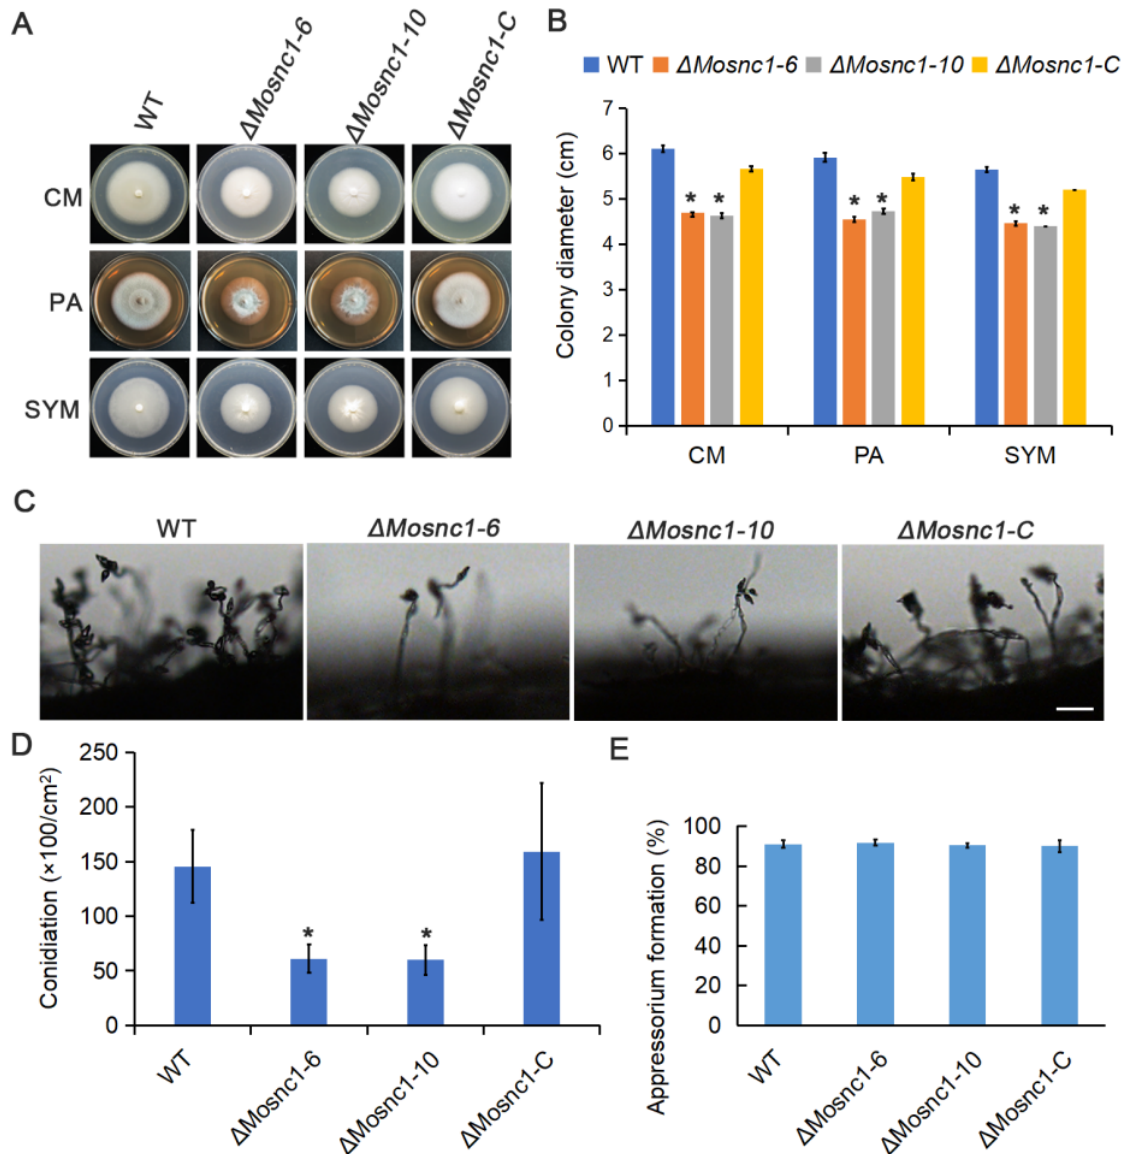

**Figure S15. Functional analyses of  $\Delta Mosnc1$  mutants.** The  $\Delta Mosnc1$  mutants displayed reduced mycelial growth on CM, PA and SYM media. (B) Statistical analysis of mycelial growth after incubation of the indicated strains on CM, PA and SYM media. Data represent mean  $\pm$  SD from three independent replicates, and asterisks indicate statistically significant differences ( $P < 0.05$ ). (C) The number of conidia on conidiophores is reduced in the  $\Delta Mosnc1$  mutant. Bar = 50  $\mu\text{m}$ . (D) Quantification of conidia. The respective strains were initially grown in the dark for three days followed by exposure to constant illumination for 14 day on PA plate (diameter 9 cm). Data represent mean  $\pm$  SD from three independent replicates, and asterisk indicate statistically significant differences ( $P < 0.05$ ). (E) Quantification of

appressorium formation. Data represent mean  $\pm$  SD from three independent replicates.

Video S1. 3D carousel view showing the positioning of BIC, vacuole and nucleus during host invasion.

Video S2. Dynamics of GFP-MoRab7- and Pwl2-mCherry-marked BIC at the early stage of host invasion.

Video S3. Dynamics of GFP-MoRab7- and Pwl2-mCherry-marked BIC at the mid stage of host invasion.

Video S4. 3D carousel view of infectious hyphae expressing GFP-MoRab7WT and Pwl2-mCherry

Video S5. 3D carousel view of infectious hyphae expressing GFP-MoRab7DN(T22N) and Pwl2-mCherry.

Video S6. 3D carousel view of infectious hyphae expressing GFP-MoRab7DN(N125I) and Pwl2-mCherry.

Video S7. 3D carousel view of infectious hyphae expressing GFP-MoRab7CA(Q67L) and Pwl2-mCherry.

Video S8. Dynamics of mCherry-MoRab7 and MoVps35-GFP during rice cell invasion by *M. oryzae*.

Video S9. A 3D carousel view showing the intimate interfacial positioning of the vesicular sorting machinery (green vesicles, MoVps35-GFP) and the BIC (red vesicles, Pwl2-mCherry) at the early stage of host invasion.

Video S10. A 3D carousel view showing the intimate interfacial positioning of the vesicular sorting machinery (green vesicles, MoVps35-GFP) and the BIC (red vesicles, Pwl2-mCherry) at the mid stage of host invasion.

Video S11. Dynamic tracking of the retromer complex subunit MoVps35 transport to the BIC-associated zone during host invasion.

Video S12. Dynamic tracking of the retromer complex subunit MoVps17 transport to the BIC-associated zone during host invasion.

Video S13. Dynamic tracking of MoVps35-GFP-labeled vesicles transports to the BIC-adjacent region after sucrose-induced plasmolysis.

Video S14. 3D carousel view of infectious hyphae expressing MoVps35-GFP and Bas4-mCherry.

Video S15. Dynamic tracking of the retromer complex subunit MoVps35-GFP transport to the EIHMx-associated zone during host invasion.

Video S16. Polarized localization of GFP-MoSnc1 during hyphal extension.

Video S17. Dynamics of GFP-MoSnc1- and Pwl2-mCherry-marked BIC at the early stage of host invasion.

Video S18. Dynamic tracking of the GFP-MoSnc1 transport to the BIC-associated zone during host invasion.

Video S19. A 3D carousel view confirms that GFP-MoSnc1-labeled vesicles are covered by the BIC during host invasion.

Video S20. 3D carousel view the indicated box showing close positioning of GFP-MoSnc1- and Bas4-mCherry-marked EIHMx.

Video S21. 3D carousel view of the indicated box showing close positioning of GFP-MoSnc1- and Bas4-mCherry-marked EIHMx.
